# Supplementary material for: High-Risk Contexts for Violence Against Women: Using Latent Class Analysis to Understand Structural and Contextual Drivers of Intimate Partner Violence at the National Level
Source: PubMed Central journal article supplement (PMC9709538; doi:10.1177/08862605221086642), 2022-03-17
Supplement: sj-pdf-1-jiv-10.1177_08862605221086642.pdf [file sj-pdf-1-jiv-10.1177_08862605221086642.pdf]

## Appendices

**Appendix A. Table A1: IPV drivers and risk factors - data sources and summaries**

|                                                                                                      | Indicator                                                         | Data source                                                                                                                                                                                                                                                                                                                                                                    | Timespan - original (sample) | Geographical coverage - original (sample) | Data/indicator description                                                                                                                                                                                                                                        | Recoding for analysis                                                                                                                                                                                                                                                                                                                                                                                                                                                                                                                                                                                                                                                             | n     | Missing -ness: n (%) | Median (IQR) / n (%) |
|------------------------------------------------------------------------------------------------------|-------------------------------------------------------------------|--------------------------------------------------------------------------------------------------------------------------------------------------------------------------------------------------------------------------------------------------------------------------------------------------------------------------------------------------------------------------------|------------------------------|-------------------------------------------|-------------------------------------------------------------------------------------------------------------------------------------------------------------------------------------------------------------------------------------------------------------------|-----------------------------------------------------------------------------------------------------------------------------------------------------------------------------------------------------------------------------------------------------------------------------------------------------------------------------------------------------------------------------------------------------------------------------------------------------------------------------------------------------------------------------------------------------------------------------------------------------------------------------------------------------------------------------------|-------|----------------------|----------------------|
| <i>Latent class indicators: structural and contextual drivers measured at the country-year level</i> |                                                                   |                                                                                                                                                                                                                                                                                                                                                                                |                              |                                           |                                                                                                                                                                                                                                                                   |                                                                                                                                                                                                                                                                                                                                                                                                                                                                                                                                                                                                                                                                                   |       |                      |                      |
| <b>Armed conflict</b>                                                                                | Conflict in last 25 years<br><br><i>Binary (1 "Yes", 0 "No")</i>  | Heidelberg Institute for International Conflict Research. (2020). <i>Conflict Barometer 2019</i> . HIIK. <a href="https://hiik.de/data-and-maps/datasets/?lang=en">https://hiik.de/data-and-maps/datasets/?lang=en</a>                                                                                                                                                         | 1825-2018 (1990-2020)        | 243 (190) countries                       | The HIIK dataset is based on information gathered in its CONTRA database. Data includes substate, intrastate, interstate and trans-state conflicts detailing start year and listed by conflict                                                                    | With the 2019 dataset, we used start year along with conflict descriptions to ascertain active conflict status in a given country-year. Next, the 2019 codebook was checked for conflicts closed or marked inactive in 2017, 2018 and 2019, and cross-referenced with the 2016 dataset (as this has start year information) for any additional countries. This data was used to code whether country-years were currently in active conflict and we derived whether conflict had occurred in the last 25 years.                                                                                                                                                                   | 5,732 | 0 (0.0%)             | 3,445 (60.1%)        |
| <b>Social discrimination</b>                                                                         | High social discrimination<br><br><i>Binary (1 "Yes", 0 "No")</i> | Inglehart, R., Haerpfer, C., Moreno, A., Welzel, C., Kizilova, K., Diez-Medrano, J., Lagos, M., Norris, P., Ponarin, E., & Puranen, B. (2020). <i>World Values Survey: All Rounds - Country-Pooled Datafile</i> . JD Systems Institute & WVSA. <a href="http://www.worldvaluessurvey.org/WVSDocumentationWVL.jsp">http://www.worldvaluessurvey.org/WVSDocumentationWVL.jsp</a> | 1981-2020 (1990-2020)        | 104 (102) countries                       | Nationally representative global survey of human beliefs and values, which contains the question "On this list are various groups of people. Could you please indicate any that you would not like to have as neighbors?" – with various groups listed as options | As data was only available at the individual level, we calculated the proportion of the surveyed population (for each country-year) who mentioned the following groups: immigrants/foreign workers, people of a different race, people of a different religion, people who speak a different language (using individual sample non-response weights in these calculations). We then took the highest of these values as representing the highest level of disclosed discriminatory preferences. We then split this into quartiles and defined a binary variable separating those in the top quartile from the other three to create high vs low social discrimination categories, | 2,083 | 3,649 (63.7%)        | 516 (24.8%)          |

|                                  |                                                                |                                                                                                                                                                                                                      |                       |                     |                                                                                                                                                                                                                                                                                                                                                                                                                                                                                                                                                                                                                                                                                                                                                                                            |                                                                                     |       |               |                                      |
|----------------------------------|----------------------------------------------------------------|----------------------------------------------------------------------------------------------------------------------------------------------------------------------------------------------------------------------|-----------------------|---------------------|--------------------------------------------------------------------------------------------------------------------------------------------------------------------------------------------------------------------------------------------------------------------------------------------------------------------------------------------------------------------------------------------------------------------------------------------------------------------------------------------------------------------------------------------------------------------------------------------------------------------------------------------------------------------------------------------------------------------------------------------------------------------------------------------|-------------------------------------------------------------------------------------|-------|---------------|--------------------------------------|
| <b>Gender inequality</b>         | Gender Inequality Index<br><br><i>Continuous (bounded 0-1)</i> | United Nations Development Programme. (2020). <i>Gender Inequality Index (GII)</i> . Human Development Reports.<br><a href="http://hdr.undp.org/en/indicators/68606#a">http://hdr.undp.org/en/indicators/68606#a</a> | 1995-2019 (1995-2020) | 162 (162) countries | Composite measure reflecting inequality in achievement between women and men; comprises five indicators (adolescent fertility, maternal mortality, educational attainment, political representation, and labour force participation) over three domains of human development (reproductive health, empowerment, and the labour market). The higher the index value, the greater the disparities between women and men. Ranges from 0 (the lowest inequality between women and men) to 1 (the highest inequality) and can be classified into high (0.60 or higher), medium (0.4 to <0.6), and low (< 0.4) inequality.                                                                                                                                                                       | Reshaped data from wide to long format.                                             | 3,762 | 1,970 (34.4%) | 0.43 (0.24 – 0.57)                   |
| <b>Socioeconomic inequality</b>  | Gini Index<br><br><i>Continuous (bounded 0-100)</i>            | World Bank. (2020). <i>Gini index (World Bank estimate)</i> . Development Research Group.<br><a href="https://data.worldbank.org/indicator/SI.POV.GINI">https://data.worldbank.org/indicator/SI.POV.GINI</a>         | 1967-2018 (1990-2020) | 165 (163) countries | Data are based on primary household survey data obtained from government statistical agencies and World Bank country departments. The index measures extent to which the distribution of income (or, in some cases, consumption expenditure) among individuals or households within an economy deviates from a perfectly equal distribution. A Lorenz curve plots the cumulative percentages of total income received against the cumulative number of recipients, starting with the poorest individual or household. The Gini index measures the area between the Lorenz curve and a hypothetical line of absolute equality, expressed as a proportion of the maximum area under the line. A Gini index of 0 represents perfect equality, while an index of 1 implies perfect inequality. | Reshaped data from wide to long format.                                             | 3,935 | 1,797 (31.4%) | 0.39 (0.33 – 0.45)                   |
| <b>Socioeconomic development</b> | GDP, PPP (current international \$)                            | World Bank. (2020). <i>GDP, PPP (current international \$)</i> . International Comparison Program, World Development                                                                                                 | 1990-2019 (1990-2020) | 197 (184) countries | This indicator provides values for gross domestic product (GDP) expressed in current international dollars, converted by purchasing power parity (PPP) conversion                                                                                                                                                                                                                                                                                                                                                                                                                                                                                                                                                                                                                          | Reshaped data from wide to long format. Log transformed due to skewed distribution. | 5,471 | 261 (4.6%)    | Log transformed : 24.5 (23.1 – 26.2) |

|                                                    |                                                                             |                                                                                                                                                                                                                                      |                       |                     |                                                                                                                                                                                                                                                                                                                                                                                                                                                                                                                                                                                                                                                                                                                                                                                                                                                   |                                                                                                                                                                                                                                                                                                                                                                                                                                                                                                                                                                                  |       |               |                                                             |
|----------------------------------------------------|-----------------------------------------------------------------------------|--------------------------------------------------------------------------------------------------------------------------------------------------------------------------------------------------------------------------------------|-----------------------|---------------------|---------------------------------------------------------------------------------------------------------------------------------------------------------------------------------------------------------------------------------------------------------------------------------------------------------------------------------------------------------------------------------------------------------------------------------------------------------------------------------------------------------------------------------------------------------------------------------------------------------------------------------------------------------------------------------------------------------------------------------------------------------------------------------------------------------------------------------------------------|----------------------------------------------------------------------------------------------------------------------------------------------------------------------------------------------------------------------------------------------------------------------------------------------------------------------------------------------------------------------------------------------------------------------------------------------------------------------------------------------------------------------------------------------------------------------------------|-------|---------------|-------------------------------------------------------------|
|                                                    | <i>Continuous (log transformed)</i>                                         | Indicators database, Eurostat-OECD PPP Programme.<br><a href="https://data.worldbank.org/indicator/NY.GDP.MKTP.PP.CD">https://data.worldbank.org/indicator/NY.GDP.MKTP.PP.CD</a>                                                     |                       |                     | factor.                                                                                                                                                                                                                                                                                                                                                                                                                                                                                                                                                                                                                                                                                                                                                                                                                                           |                                                                                                                                                                                                                                                                                                                                                                                                                                                                                                                                                                                  |       |               | Original: \$42,400m (\$10,800m - \$230,000m)                |
| <b>Normalisation and acceptability of violence</b> | Homicide rate per 100,000<br><br><i>Continuous (log transformed)</i>        | DATAUNODC. (2020). <i>Homicide rate</i> . United Nations Office on Drugs and Crime.<br><a href="https://dataunodc.un.org/content/data/homicide/homicide-rate">https://dataunodc.un.org/content/data/homicide/homicide-rate</a>       | 1990-2018 (1990-2020) | 203 (169) countries | Annual United Nations Crime Trends Survey (UN-CTS) with additional data sourced from the most reliable sources available. Intentional homicide = Unlawful death inflicted upon a person with the intent to cause death or serious injury. Inclusions: Murder; honour killing; serious assault leading to death; death as a result of terrorist activities; dowry-related killings; femicide; infanticide; voluntary manslaughter; extrajudicial killings; killings caused by excessive use of force by law enforcement/state officials. Exclusions: Death due to legal interventions; justifiable homicide in self-defence; attempted intentional homicide; homicide without the element of intent is non-intentional homicide; non-negligent or involuntary manslaughter; assisting suicide or instigating suicide; illegal feticide; euthanasia | Log transformed due to skewed distribution.                                                                                                                                                                                                                                                                                                                                                                                                                                                                                                                                      | 4,260 | 1,472 (25.7%) | Log transformed : 1.2 (0.3 – 2.2) Original: 3.3 (1.4 – 8.8) |
| <b>Climate change and natural disasters</b>        | Severe natural disaster in last 5yrs<br><br><i>Binary (1 “Yes”, 0 “No”)</i> | Centre for Research on the Epidemiology of Disasters (CRED). (2020). <i>Emergency Events Database (EM-DAT)</i> . Université catholique de Louvain (UCLouvain), Belgium.<br><a href="https://www.emdat.be/">https://www.emdat.be/</a> | 1900-2020 (1990-2020) | 243 (190) countries | Data includes natural, technological and complex emergency events where: Deaths: 10 or more people deaths; Affected: 100 or more people affected/injured/homeless; Declaration/international appeal: Declaration by the country of a state of emergency and/or an appeal for international assistance.                                                                                                                                                                                                                                                                                                                                                                                                                                                                                                                                            | We included only natural disasters (i.e. geophysical, meteorological, hydrological, biological, climatological, and extra-terrestrial). Total deaths and total affected summed across all natural disasters in a given country-year and added together to get total impact. Country-years in the top impact quintile were considered to have experienced a severe natural disaster. So as to capture longer term impacts of natural disaster exposure, we created a variable that indicated whether there has been a severe (top quintile) natural disaster in the last 5 years. | 5,732 | 0 (0.0%)      | 1,940 (33.9%)                                               |
| <b>Colonisation</b>                                | Ever                                                                        | Becker, B. (2019). <i>Colonial</i>                                                                                                                                                                                                   | 1462-1984             | 243 (190)           | The Colonial Dates Dataset                                                                                                                                                                                                                                                                                                                                                                                                                                                                                                                                                                                                                                                                                                                                                                                                                        | The COLDAT colonies and start                                                                                                                                                                                                                                                                                                                                                                                                                                                                                                                                                    | 5,732 | 0             | 4,309                                                       |

|  |                          |                                                                                                                                               |             |           |                                                                                                                         |                                                                                                                                                                                                                                                                                                                                                                                                                                                                                                                                |        |         |
|--|--------------------------|-----------------------------------------------------------------------------------------------------------------------------------------------|-------------|-----------|-------------------------------------------------------------------------------------------------------------------------|--------------------------------------------------------------------------------------------------------------------------------------------------------------------------------------------------------------------------------------------------------------------------------------------------------------------------------------------------------------------------------------------------------------------------------------------------------------------------------------------------------------------------------|--------|---------|
|  | colonised                | <i>Dates Dataset (COLDAT)</i> , V2. Harvard Dataverse.<br><a href="https://doi.org/10.7910/DVN/T9SDEW">https://doi.org/10.7910/DVN/T9SDEW</a> | (1990-2020) | countries | (COLDAT) aggregates information on the reach and duration of European colonial empires from renowned secondary sources. | and end dates of colonial rule were used to derive colonisation history (country-years which preceded start of colonisation were coded as No). We supplemented the COLDAT data to identify whether the country was a post-soviet country (i.e. had been colonised by Russia) or had been colonised by the USA. In addition, we manually searched colonial histories for countries not included in the COLDAT list so that more information could be added to our dataset (we note that this information may be less reliable). | (0.0%) | (75.2%) |
|  | Binary (1 "Yes", 0 "No") |                                                                                                                                               |             |           |                                                                                                                         |                                                                                                                                                                                                                                                                                                                                                                                                                                                                                                                                |        |         |

**Risk factors for further analysis: individual risk factors measured at the country-year level**

|                             |                                                                            |                                                                                                                                                                                                                                                                                                                                        |                        |                     |                                                                                                                                                                                                                                                                                                                             |                                                                                                                                                                                                                                                            |       |               |                    |
|-----------------------------|----------------------------------------------------------------------------|----------------------------------------------------------------------------------------------------------------------------------------------------------------------------------------------------------------------------------------------------------------------------------------------------------------------------------------|------------------------|---------------------|-----------------------------------------------------------------------------------------------------------------------------------------------------------------------------------------------------------------------------------------------------------------------------------------------------------------------------|------------------------------------------------------------------------------------------------------------------------------------------------------------------------------------------------------------------------------------------------------------|-------|---------------|--------------------|
| <b>Migration experience</b> | Refugee population (% Pop.)<br><br><i>Continuous (bounded 0-100)</i>       | World Bank. (2020). <i>Refugee population by country or territory of asylum</i> . United Nations High Commissioner for Refugees (UNHCR) and UNRWA through UNHCR's Refugee Data Finder at <a href="https://data.worldbank.org/indicator/SM.POP.REFG">unhcr.org/refugee-statistics. https://data.worldbank.org/indicator/SM.POP.REFG</a> | 1960-2019 (1990-2020)  | 164 (164) countries | Refugee population by country or territory of asylum = the number of people who have crossed an international border to find sanctuary and have been granted refugee or refugee-like status or temporary protection.                                                                                                        | Reshaped into long format. Divided by total population and multiplied by 100 to create % variable, taking account of country size.                                                                                                                         | 4,755 | 977 (17.1%)   | 0.1 (0.0 - 0.4)    |
| <b>Disability</b>           | Living with a disability (% Pop.)<br><br><i>Continuous (bounded 0-100)</i> | International Minnesota Population Centre. (2020). <i>Integrated Public Use Microdata Series, International: Version 7.3</i> . IPUMS. <a href="https://doi.org/https://doi.org/10.18128/D020.V7.3">https://doi.org/https://doi.org/10.18128/D020.V7.3</a>                                                                              | 1800s-2017 (1990-2020) | 72 (72) countries   | "Disabled" indicates whether the person reported a disability of any kind (IPUMS harmonised variable across different surveys and questions from various population-based surveys)                                                                                                                                          | Only used data from 1900 onwards. Individual survey data used to generate country-year level proportions of population with a disability taking into account sample person weights. Proportions multiplied by 100 to give percentage prevalence estimates. | 1,654 | 4,078 (71.1%) | 1.9 (1.3 - 4.1)    |
| <b>Poor mental health</b>   | Mental health disorders (% Pop.)<br><br><i>Continuous (bounded 0-100)</i>  | Institute for Health Metrics and Evaluation (IHME). (2020). <i>GBD Results Tool: B.6 Mental disorders</i> . <a href="http://ghdx.healthdata.org/gbd-results-tool">http://ghdx.healthdata.org/gbd-results-tool</a>                                                                                                                      | 1990-2019 (1990-2020)  | 204 (189) countries | B.6 Mental disorders includes schizophrenia, depressive disorders, eating disorders, autism, ADHD, conduct disorders, idiopathic developmental intellectual disability, other mental disorders. GBD data is based on a combination of sources, including medical and national records, epidemiological data, in addition to | None.                                                                                                                                                                                                                                                      | 5,725 | 7 (0.1%)      | 12.3 (11.2 - 14.7) |

|                      |                                                                          |                                                                                                                                                                                                                                                                                                                                                                          |                       |                     |                                                                                                                                                                                                                                                                     |                                                                                            |       |               |                    |
|----------------------|--------------------------------------------------------------------------|--------------------------------------------------------------------------------------------------------------------------------------------------------------------------------------------------------------------------------------------------------------------------------------------------------------------------------------------------------------------------|-----------------------|---------------------|---------------------------------------------------------------------------------------------------------------------------------------------------------------------------------------------------------------------------------------------------------------------|--------------------------------------------------------------------------------------------|-------|---------------|--------------------|
|                      |                                                                          |                                                                                                                                                                                                                                                                                                                                                                          |                       |                     | survey data. Where raw data for a particular country is scarce, epidemiological data and meta-regression models are used based on available data from neighbouring countries. Data therefore present an estimate (rather than official diagnosis) of mental health. |                                                                                            |       |               |                    |
| <b>Alcohol</b>       | Alcohol consumption (l per capita: Men)<br><br><i>Continuous</i>         | World Bank. (2020). <i>Total alcohol consumption per capita, male (liters of pure alcohol, projected estimates, male 15+ years of age)</i> . World Health Organization, Global Health Observatory Data Repository (apps.who.int/ghodata).<br><a href="https://data.worldbank.org/indicator/SH.ALC.PCAP.MA.LI">https://data.worldbank.org/indicator/SH.ALC.PCAP.MA.LI</a> | 2000-2018 (2000-2020) | 187 (183) countries | Defined as the total (sum of recorded and unrecorded alcohol) amount of alcohol consumed per male (15 years of age or older) over a calendar year, in litres of pure alcohol, adjusted for tourist consumption.                                                     | Reshaped into long format.                                                                 | 3,767 | 1,965 (34.3%) | 9.0 (3.6 - 14.9)   |
| <b>Substance use</b> | Substance use disorders (% Men)<br><br><i>Continuous (bounded 0-100)</i> | Our World in Data. (2020). <i>Prevalence of drug use disorders, males vs females, 2017</i> . Institute for Health Metrics and Evaluation (IHME), Global Burden of Disease.<br><a href="https://ourworldindata.org/grapher/prevalence-of-drug-use-disorders-males-vs-females">https://ourworldindata.org/grapher/prevalence-of-drug-use-disorders-males-vs-females</a>    | 1990-2017 (1990-2020) | 195 (189) countries | The share of men with a substance use disorder.                                                                                                                                                                                                                     | None.                                                                                      | 5,725 | 7 (0.1%)      | 0.9 (0.7 - 1.2)    |
| <b>HIV/AIDS</b>      | HIV/AIDS (% Pop. 15-49 yrs)<br><br><i>Continuous (bounded 0-100)</i>     | Our World in Data. (2020). <i>HIV/AIDS: Prevalence in the total population</i> . Institute for Health Metrics and Evaluation (IHME), Global Burden of Disease.<br><a href="https://ourworldindata.org/hiv-aids">https://ourworldindata.org/hiv-aids</a>                                                                                                                  | 1990-2017 (1990-2020) | 195 (189) countries | The share of people aged 15 to 49 years old who are infected with HIV                                                                                                                                                                                               | None.                                                                                      | 5,725 | 7 (0.1%)      | 0.1 (0.0 - 0.8)    |
| <b>Age</b>           | Median age of total population (yrs)                                     | United Nations Department of Economic and Social Affairs. (2019). <i>SAI/POP/5: Median age by</i>                                                                                                                                                                                                                                                                        | 1950-2020 (1990-2020) | 201 (188) countries | Estimates and Medium variant, 1950 - 2100.                                                                                                                                                                                                                          | Reshaped from wide to long format. We only used estimates to 2020, not future projections. | 5,709 | 23 (0.4%)     | 24.0 (18.6 - 33.1) |

Continuous aggregate and constituents,  
1950-2100 (years).  
Population Dynamics -  
World Population  
Prospects.  
<https://population.un.org/wpp/Download/Standard/Population/>

---

*Data summaries refer to fully compiled, partially imputed, and missingness-restricted dataset (i.e. our analytical sample) where  $N = 5,732$  country-years. Percentages are adjusted for clustering at country-level but don't account for time-based variation (medians don't account for either). See Appendix F for data acknowledgements.*

**Appendix B. Table A2: IPV estimates (women’s reports of experiencing physical and/or sexual IPV in the last 12m) and data sources – arranged alphabetically and chronologically by ISO code**

| Country-year    | Denom. (yrs) | Est. (%) | Included in UN SDG database ? | Source                                                                                                        | Link                                                                                                                      | Other source: detail                                                                                                                                                                                                                                                           | Sub-national estimate? |
|-----------------|--------------|----------|-------------------------------|---------------------------------------------------------------------------------------------------------------|---------------------------------------------------------------------------------------------------------------------------|--------------------------------------------------------------------------------------------------------------------------------------------------------------------------------------------------------------------------------------------------------------------------------|------------------------|
| <b>AFG 2015</b> | 15-49        | 46.1     | Yes                           | DHS                                                                                                           | <a href="https://unstats.un.org/sdgs/indicat-ors/database/">https://unstats.un.org/sdgs/indicat-ors/database/</a>         |                                                                                                                                                                                                                                                                                | No                     |
| <b>AFG 2018</b> | 15-49        | 35       | No                            | WHO VAW 2018                                                                                                  | <a href="https://www.who.int/publications/i/item/9789240022256">https://www.who.int/publications/i/item/9789240022256</a> |                                                                                                                                                                                                                                                                                | No                     |
| <b>AGO 2016</b> | 15-49        | 25.9     | Yes                           | DHS                                                                                                           | <a href="https://unstats.un.org/sdgs/indicat-ors/database/">https://unstats.un.org/sdgs/indicat-ors/database/</a>         |                                                                                                                                                                                                                                                                                | No                     |
| <b>AGO 2018</b> | 15-49        | 25       | No                            | WHO VAW 2018                                                                                                  | <a href="https://www.who.int/publications/i/item/9789240022256">https://www.who.int/publications/i/item/9789240022256</a> |                                                                                                                                                                                                                                                                                | No                     |
| <b>ALB 2018</b> | 15-49        | 6        | No                            | WHO VAW 2018                                                                                                  | <a href="https://www.who.int/publications/i/item/9789240022256">https://www.who.int/publications/i/item/9789240022256</a> |                                                                                                                                                                                                                                                                                | No                     |
| <b>ARG 2015</b> | 18-69        | 2.7      | No                            | Other (via UN Women Global Database on Violence against Women)                                                | <a href="https://evaw-global-database.unwomen.org/en">https://evaw-global-database.unwomen.org/en</a>                     | Ministerio de Justicia y Derechos Humanos de la Nación. 2017. Primer Estudio Nacional sobre Violencias contra la Mujer 2015. Basado en la International Violence Against Women Survey (IVAWS), 1a ed. Ministerio de Justicia. Ciudad Autónoma de Buenos Aires: Ediciones SAIJ. | No                     |
| <b>ARG 2018</b> | 15-49        | 4        | No                            | WHO VAW 2018                                                                                                  | <a href="https://www.who.int/publications/i/item/9789240022256">https://www.who.int/publications/i/item/9789240022256</a> |                                                                                                                                                                                                                                                                                | No                     |
| <b>ARM 2016</b> | 15-49        | 3.5      | Yes                           | DHS                                                                                                           | <a href="https://unstats.un.org/sdgs/indicat-ors/database/">https://unstats.un.org/sdgs/indicat-ors/database/</a>         |                                                                                                                                                                                                                                                                                | No                     |
| <b>ARM 2018</b> | 15-49        | 5        | No                            | WHO VAW 2018                                                                                                  | <a href="https://www.who.int/publications/i/item/9789240022256">https://www.who.int/publications/i/item/9789240022256</a> |                                                                                                                                                                                                                                                                                | No                     |
| <b>AUS 2003</b> | 16+          | 4        | No                            | IVAWS (via UN Women matrix)                                                                                   | <a href="https://www.who.int/publications/i/item/9789240022256">https://www.who.int/publications/i/item/9789240022256</a> |                                                                                                                                                                                                                                                                                | No                     |
| <b>AUS 2016</b> | 18+          | 2.2      | No                            | Other (via UN Women Global Database on Violence against Women)                                                | <a href="https://evaw-global-database.unwomen.org/en">https://evaw-global-database.unwomen.org/en</a>                     | Australian Bureau of Statistics, 2017. Personal Safety Survey 2016. Canberra, Australia.                                                                                                                                                                                       | No                     |
| <b>AUS 2018</b> | 15-49        | 3        | No                            | WHO VAW 2018                                                                                                  | <a href="https://www.who.int/publications/i/item/9789240022256">https://www.who.int/publications/i/item/9789240022256</a> |                                                                                                                                                                                                                                                                                | No                     |
| <b>AUT 2012</b> | 18-74        | 4        | Yes                           | calculated by FRA based on available country data from the 2012 FRA Violence against women: an EU-wide Survey | <a href="https://unstats.un.org/sdgs/indicat-ors/database/">https://unstats.un.org/sdgs/indicat-ors/database/</a>         |                                                                                                                                                                                                                                                                                | No                     |
| <b>AUT 2018</b> | 15-49        | 4        | No                            | WHO VAW 2018                                                                                                  | <a href="https://www.who.int/publications/i/item/9789240022256">https://www.who.int/publications/i/item/9789240022256</a> |                                                                                                                                                                                                                                                                                | No                     |
| <b>AZE 2006</b> | 15-49        | 10.2     | Yes                           | DHS (corrected UN SDG value from 9.8 to 10.2 based on what is reported in DHS report and UN Women matrix)     | <a href="https://unstats.un.org/sdgs/indicat-ors/database/">https://unstats.un.org/sdgs/indicat-ors/database/</a>         |                                                                                                                                                                                                                                                                                | No                     |
| <b>AZE 2018</b> | 15-49        | 5        | No                            | WHO VAW 2018                                                                                                  | <a href="https://www.who.int/publications/i/item/9789240022256">https://www.who.int/publications/i/item/9789240022256</a> |                                                                                                                                                                                                                                                                                | No                     |
| <b>BDI 2017</b> | 15-49        | 27.8     | No                            | DHS (corrected UN SDG value from 27.9 to 27.8 based on what is reported in DHS report)                        | <a href="https://dhsprogram.com/">https://dhsprogram.com/</a>                                                             |                                                                                                                                                                                                                                                                                | No                     |
| <b>BDI 2018</b> | 15-49        | 22       | No                            | WHO VAW 2018                                                                                                  | <a href="https://www.who.int/publications/i/item/9789240022256">https://www.who.int/publications/i/item/9789240022256</a> |                                                                                                                                                                                                                                                                                | No                     |
| <b>BEL 2012</b> | 18-74        | 8        | Yes                           | calculated by FRA                                                                                             | <a href="https://unstats.un.org/sdgs/indicat-ors/database/">https://unstats.un.org/sdgs/indicat-ors/database/</a>         |                                                                                                                                                                                                                                                                                | No                     |

|                 |       |           |     |                                                                                                                                                                                                                              |                                                                                                                                                                                                                                               |                                                                                                                                                               |                                                           |
|-----------------|-------|-----------|-----|------------------------------------------------------------------------------------------------------------------------------------------------------------------------------------------------------------------------------|-----------------------------------------------------------------------------------------------------------------------------------------------------------------------------------------------------------------------------------------------|---------------------------------------------------------------------------------------------------------------------------------------------------------------|-----------------------------------------------------------|
|                 |       |           |     | based on available country data from the 2012 FRA Violence against women: an EU-wide Survey                                                                                                                                  | <a href="https://www.who.int/publications/database/">ors/database/</a>                                                                                                                                                                        |                                                                                                                                                               |                                                           |
| <b>BEL 2018</b> | 15-49 | 5         | No  | WHO VAW 2018                                                                                                                                                                                                                 | <a href="https://www.who.int/publications/i/item/9789240022256">https://www.who.int/publications/i/item/9789240022256</a>                                                                                                                     | No                                                                                                                                                            |                                                           |
| <b>BEN 2018</b> | 15-49 | 13.9      | No  | DHS                                                                                                                                                                                                                          | <a href="https://dhsprogram.com/">https://dhsprogram.com/</a>                                                                                                                                                                                 | No                                                                                                                                                            |                                                           |
| <b>BFA 2011</b> | 15-49 | 9.6       | No  | DHS (corrected from 9.3 to 9.6 after checking DHS report)                                                                                                                                                                    | <a href="https://dhsprogram.com/">https://dhsprogram.com/</a>                                                                                                                                                                                 | No                                                                                                                                                            |                                                           |
| <b>BFA 2018</b> | 15-49 | 11        | No  | WHO VAW 2018                                                                                                                                                                                                                 | <a href="https://www.who.int/publications/i/item/9789240022256">https://www.who.int/publications/i/item/9789240022256</a>                                                                                                                     | No                                                                                                                                                            |                                                           |
| <b>BGD 2003</b> | 15-49 | 31.0<br>5 | No  | WHO multi-country study (Garcia-Moreno et al., 2006)                                                                                                                                                                         | <a href="https://www.who.int/gender/violence/who_multicountry_study/media_corner/Prevalence_intimatepartner_WHOStudy.pdf">https://www.who.int/gender/violence/who_multicountry_study/media_corner/Prevalence_intimatepartner_WHOStudy.pdf</a> | Yes - based on averaged estimates for 2 or more locations                                                                                                     |                                                           |
| <b>BGD 2007</b> | 15-49 | 23.9      | No  | DHS (via UN Women matrix)                                                                                                                                                                                                    | <a href="https://www.endvawnow.org/uploads/browser/files/vawprevalence_matrix_june2013.pdf">https://www.endvawnow.org/uploads/browser/files/vawprevalence_matrix_june2013.pdf</a>                                                             | Yes - based on averaged estimates for 2 or more locations                                                                                                     |                                                           |
| <b>BGD 2015</b> | 15+   | 28.8      | Yes | Calculated by UNFPA based on available country data from the Violence against Women Survey 2015                                                                                                                              | <a href="https://unstats.un.org/sdgs/indicators/database/">https://unstats.un.org/sdgs/indicators/database/</a>                                                                                                                               | Yes - based on one estimate only                                                                                                                              |                                                           |
| <b>BGD 2018</b> | 15-49 | 23        | No  | WHO VAW 2018                                                                                                                                                                                                                 | <a href="https://www.who.int/publications/i/item/9789240022256">https://www.who.int/publications/i/item/9789240022256</a>                                                                                                                     | No                                                                                                                                                            |                                                           |
| <b>BGR 2012</b> | 18-74 | 9         | Yes | calculated by FRA based on available country data from the 2012 FRA Violence against women: an EU-wide Survey                                                                                                                | <a href="https://unstats.un.org/sdgs/indicators/database/">https://unstats.un.org/sdgs/indicators/database/</a>                                                                                                                               | No                                                                                                                                                            |                                                           |
| <b>BGR 2018</b> | 15-49 | 6         | No  | WHO VAW 2018                                                                                                                                                                                                                 | <a href="https://www.who.int/publications/i/item/9789240022256">https://www.who.int/publications/i/item/9789240022256</a>                                                                                                                     | No                                                                                                                                                            |                                                           |
| <b>BIH 2018</b> | 18-74 | 3.4       | No  | Other (via UN Women Global Database on Violence against Women)                                                                                                                                                               | <a href="https://evaw-global-database.unwomen.org/en">https://evaw-global-database.unwomen.org/en</a>                                                                                                                                         | Organization for Security and Co-operation in Europe (OSCE). 2019. OSCE-led Survey on Violence against Women: Main Report. Vienna, Austria: OSCE Secretariat. | Yes - based on averaged estimates for 2 or more locations |
| <b>BLR 2018</b> | 15-49 | 6         | No  | WHO VAW 2018                                                                                                                                                                                                                 | <a href="https://www.who.int/publications/i/item/9789240022256">https://www.who.int/publications/i/item/9789240022256</a>                                                                                                                     | No                                                                                                                                                            |                                                           |
| <b>BLZ 2018</b> | 15-49 | 8         | No  | WHO VAW 2018                                                                                                                                                                                                                 | <a href="https://www.who.int/publications/i/item/9789240022256">https://www.who.int/publications/i/item/9789240022256</a>                                                                                                                     | No                                                                                                                                                            |                                                           |
| <b>BOL 2008</b> | 15-49 | 25.2      | No  | DHS data reported in PAHO 2012 publication VAW in LAC: Comparative analysis of population-based data from 12 countries                                                                                                       | <a href="https://iris.paho.org/handle/10665.2/3471">https://iris.paho.org/handle/10665.2/3471</a>                                                                                                                                             | No                                                                                                                                                            |                                                           |
| <b>BOL 2016</b> | 15+   | 27.1      | Yes | PAHO 2018 publication Intimate Partner Violence against Women in the Americas: calculated by PAHO based on available country data from the Encuesta de Prevalencia y Características de la Violencia contra las Mujeres 2016 | <a href="https://unstats.un.org/sdgs/indicators/database/">https://unstats.un.org/sdgs/indicators/database/</a>                                                                                                                               | Yes - based on averaged estimates for 2 or more locations                                                                                                     |                                                           |
| <b>BOL 2018</b> | 15-49 | 18        | No  | WHO VAW 2018                                                                                                                                                                                                                 | <a href="https://www.who.int/publications/i/item/9789240022256">https://www.who.int/publications/i/item/9789240022256</a>                                                                                                                     | No                                                                                                                                                            |                                                           |
| <b>BRA 2003</b> | 15-49 | 12.0      | No  | WHO multi-country                                                                                                                                                                                                            | <a href="https://www.who.int/gender/violence">https://www.who.int/gender/violence</a>                                                                                                                                                         | Yes - based                                                                                                                                                   |                                                           |



|                 |       |      |     |                                                                |                                                                                                                                                                                   |                                                                                                                                                                                                                                                                                                                                                                                      |                                                           |
|-----------------|-------|------|-----|----------------------------------------------------------------|-----------------------------------------------------------------------------------------------------------------------------------------------------------------------------------|--------------------------------------------------------------------------------------------------------------------------------------------------------------------------------------------------------------------------------------------------------------------------------------------------------------------------------------------------------------------------------------|-----------------------------------------------------------|
|                 |       | 5    |     | study (Garcia-Moreno et al., 2006)                             | <a href="https://www.who.int/publications/i/item/9789240022256">nce/who_multicountry_study/media_corner/Prevalence_intimatepartner_WHOStudy.pdf</a>                               |                                                                                                                                                                                                                                                                                                                                                                                      | on averaged estimates for 2 or more locations             |
| <b>BRA 2017</b> | 16+   | 3.1  | No  | Other (via UN Women Global Database on Violence against Women) | <a href="https://evaw-global-database.unwomen.org/en">https://evaw-global-database.unwomen.org/en</a>                                                                             | Bott S, Guedes A, Ruiz-Celis AP, Mendoza JA. Intimate partner violence in the Americas: A systematic review and reanalysis of national prevalence estimates. Based on data from: Instituto de Pesquisa DataSenado. 2018. Violência Doméstica e familiar contra a mulher: Pesquisa DataSenado. Brasília: Instituto de Pesquisa DataSenado, Observatório da Mulher contra a Violência. | No                                                        |
| <b>BRA 2018</b> | 15-49 | 6    | No  | WHO VAW 2018                                                   | <a href="https://www.who.int/publications/i/item/9789240022256">https://www.who.int/publications/i/item/9789240022256</a>                                                         |                                                                                                                                                                                                                                                                                                                                                                                      | No                                                        |
| <b>BTN 2017</b> | 15-64 | 6.1  | No  | Other (via UN Women Global Database on Violence against Women) | <a href="https://evaw-global-database.unwomen.org/en">https://evaw-global-database.unwomen.org/en</a>                                                                             | National Commission for Women and Children. 2019. National Study on Women's Health and Life Experiences 2017.                                                                                                                                                                                                                                                                        | Yes - based on averaged estimates for 2 or more locations |
| <b>BTN 2018</b> | 15-49 | 9    | No  | WHO VAW 2018                                                   | <a href="https://www.who.int/publications/i/item/9789240022256">https://www.who.int/publications/i/item/9789240022256</a>                                                         |                                                                                                                                                                                                                                                                                                                                                                                      | No                                                        |
| <b>BWA 2018</b> | 15-49 | 17   | No  | WHO VAW 2018                                                   | <a href="https://www.who.int/publications/i/item/9789240022256">https://www.who.int/publications/i/item/9789240022256</a>                                                         |                                                                                                                                                                                                                                                                                                                                                                                      | No                                                        |
| <b>CAF 2006</b> | 15-49 | 26.3 | Yes | MICS                                                           | <a href="https://unstats.un.org/sdgs/indicators/database/">https://unstats.un.org/sdgs/indicators/database/</a>                                                                   |                                                                                                                                                                                                                                                                                                                                                                                      | No                                                        |
| <b>CAF 2018</b> | 15-49 | 21   | No  | WHO VAW 2018                                                   | <a href="https://www.who.int/publications/i/item/9789240022256">https://www.who.int/publications/i/item/9789240022256</a>                                                         |                                                                                                                                                                                                                                                                                                                                                                                      | No                                                        |
| <b>CAN 1993</b> | 15+   | 3    | No  | Other                                                          |                                                                                                                                                                                   | Statistics Canada. 2006. Measuring Violence Against Women Statistical Trends 2006. Statistics Canada. Ottawa.                                                                                                                                                                                                                                                                        | No                                                        |
| <b>CAN 1999</b> | 15+   | 3    | No  | Other                                                          |                                                                                                                                                                                   | Statistics Canada, Canadian Centre for Justice Statistics. 2011. Family Violence in Canada: A Statistical Profile. Statistics Canada. Ottawa.                                                                                                                                                                                                                                        | No                                                        |
| <b>CAN 2004</b> | 15+   | 2    | No  | Other (via UN Women matrix)                                    | <a href="https://www.endvawnow.org/uploads/browser/files/vawprevalence_matrix_june2013.pdf">https://www.endvawnow.org/uploads/browser/files/vawprevalence_matrix_june2013.pdf</a> | Statistics Canada. 2006. Measuring Violence Against Women Statistical Trends 2006. Statistics Canada. Ottawa.                                                                                                                                                                                                                                                                        | No                                                        |
| <b>CAN 2009</b> | 15+   | 1.9  | No  | Other (via UN Women matrix)                                    | <a href="https://www.endvawnow.org/uploads/browser/files/vawprevalence_matrix_june2013.pdf">https://www.endvawnow.org/uploads/browser/files/vawprevalence_matrix_june2013.pdf</a> | Statistics Canada, Canadian Centre for Justice Statistics. 2011. Family Violence in Canada: A Statistical Profile. Statistics Canada. Ottawa.                                                                                                                                                                                                                                        | No                                                        |

|                 |       |      |     |                                                                                                                        |                                                                                                                                                                                                                                                                     |                                  |
|-----------------|-------|------|-----|------------------------------------------------------------------------------------------------------------------------|---------------------------------------------------------------------------------------------------------------------------------------------------------------------------------------------------------------------------------------------------------------------|----------------------------------|
| <b>CAN 2018</b> | 15-49 | 3    | No  | WHO VAW 2018                                                                                                           | <a href="https://www.who.int/publications/i/item/9789240022256">https://www.who.int/publications/i/item/9789240022256</a>                                                                                                                                           | No                               |
| <b>CHE 2003</b> | 16+   | 1    | No  | IVAWS (via UN Women matrix, not confirmed)                                                                             | <a href="https://www.endvawnow.org/uploads/browser/files/vawprevalence_matrix_june2013.pdf">https://www.endvawnow.org/uploads/browser/files/vawprevalence_matrix_june2013.pdf</a>                                                                                   | No                               |
| <b>CHE 2018</b> | 15-49 | 2    | No  | WHO VAW 2018                                                                                                           | <a href="https://www.who.int/publications/i/item/9789240022256">https://www.who.int/publications/i/item/9789240022256</a>                                                                                                                                           | No                               |
| <b>CHL 2018</b> | 15-49 | 6    | No  | WHO VAW 2018                                                                                                           | <a href="https://www.who.int/publications/i/item/9789240022256">https://www.who.int/publications/i/item/9789240022256</a>                                                                                                                                           | No                               |
| <b>CHN 2013</b> | 18-49 | 1.9  | No  | UNMCS                                                                                                                  | <a href="https://svri.org/sites/default/files/attachments/2018-05-09/Why%20do%20some%20men%20use%20violence%20against%20women_1.pdf">https://svri.org/sites/default/files/attachments/2018-05-09/Why%20do%20some%20men%20use%20violence%20against%20women_1.pdf</a> | Yes - based on one estimate only |
| <b>CHN 2018</b> | 15-49 | 8    | No  | WHO VAW 2018                                                                                                           | <a href="https://www.who.int/publications/i/item/9789240022256">https://www.who.int/publications/i/item/9789240022256</a>                                                                                                                                           | No                               |
| <b>CIV 2012</b> | 15-49 | 22.9 | No  | DHS (corrected from 22 to 22.9 after checking report)                                                                  | <a href="https://dhsprogram.com/">https://dhsprogram.com/</a>                                                                                                                                                                                                       | No                               |
| <b>CIV 2018</b> | 15-49 | 16   | No  | WHO VAW 2018                                                                                                           | <a href="https://www.who.int/publications/i/item/9789240022256">https://www.who.int/publications/i/item/9789240022256</a>                                                                                                                                           | No                               |
| <b>CMR 2004</b> | 15-49 | 28   | No  | DHS                                                                                                                    | <a href="https://dhsprogram.com/">https://dhsprogram.com/</a>                                                                                                                                                                                                       | No                               |
| <b>CMR 2011</b> | 15-49 | 32.6 | No  | DHS                                                                                                                    | <a href="https://dhsprogram.com/">https://dhsprogram.com/</a>                                                                                                                                                                                                       | No                               |
| <b>CMR 2014</b> | 15-49 | 32.7 | Yes | MICS                                                                                                                   | <a href="https://unstats.un.org/sdgs/indicators/database/">https://unstats.un.org/sdgs/indicators/database/</a>                                                                                                                                                     | No                               |
| <b>CMR 2018</b> | 15-49 | 21.5 | No  | DHS                                                                                                                    | <a href="https://dhsprogram.com/">https://dhsprogram.com/</a>                                                                                                                                                                                                       | No                               |
| <b>COD 2007</b> | 15-49 | 64.1 | No  | DHS                                                                                                                    | <a href="https://dhsprogram.com/">https://dhsprogram.com/</a>                                                                                                                                                                                                       | No                               |
| <b>COD 2014</b> | 15-49 | 36.8 | Yes | DHS                                                                                                                    | <a href="https://unstats.un.org/sdgs/indicators/database/">https://unstats.un.org/sdgs/indicators/database/</a>                                                                                                                                                     | No                               |
| <b>COD 2018</b> | 15-49 | 36   | No  | WHO VAW 2018                                                                                                           | <a href="https://www.who.int/publications/i/item/9789240022256">https://www.who.int/publications/i/item/9789240022256</a>                                                                                                                                           | No                               |
| <b>COK 2012</b> | 15-64 | 9.4  | Yes | The Cook Islands Family Health and Safety Study                                                                        | <a href="https://unstats.un.org/sdgs/indicators/database/">https://unstats.un.org/sdgs/indicators/database/</a>                                                                                                                                                     | No                               |
| <b>COK 2018</b> | 15-49 | 14   | No  | WHO VAW 2018                                                                                                           | <a href="https://www.who.int/publications/i/item/9789240022256">https://www.who.int/publications/i/item/9789240022256</a>                                                                                                                                           | No                               |
| <b>COL 2005</b> | 15-49 | 22.1 | No  | DHS data reported in PAHO 2012 publication VAW in LAC: Comparative analysis of population-based data from 12 countries | <a href="https://iris.paho.org/handle/10665.2/3471">https://iris.paho.org/handle/10665.2/3471</a>                                                                                                                                                                   | No                               |
| <b>COL 2015</b> | 15-49 | 18.4 | Yes | DHS* (I couldn't find this estimate in the report)                                                                     | <a href="https://unstats.un.org/sdgs/indicators/database/">https://unstats.un.org/sdgs/indicators/database/</a>                                                                                                                                                     | No                               |
| <b>COL 2018</b> | 15-49 | 12   | No  | WHO VAW 2018                                                                                                           | <a href="https://www.who.int/publications/i/item/9789240022256">https://www.who.int/publications/i/item/9789240022256</a>                                                                                                                                           | No                               |
| <b>COM 2012</b> | 15-49 | 4.9  | Yes | DHS                                                                                                                    | <a href="https://unstats.un.org/sdgs/indicators/database/">https://unstats.un.org/sdgs/indicators/database/</a>                                                                                                                                                     | No                               |
| <b>COM 2018</b> | 15-49 | 8    | No  | WHO VAW 2018                                                                                                           | <a href="https://www.who.int/publications/i/item/9789240022256">https://www.who.int/publications/i/item/9789240022256</a>                                                                                                                                           | No                               |
| <b>CPV 2005</b> | 15-49 | 7.8  | Yes | DHS                                                                                                                    | <a href="https://unstats.un.org/sdgs/indicators/database/">https://unstats.un.org/sdgs/indicators/database/</a>                                                                                                                                                     | No                               |
| <b>CPV 2018</b> | 15-49 | 11   | No  | WHO VAW 2018                                                                                                           | <a href="https://www.who.int/publications/i/item/9789240022256">https://www.who.int/publications/i/item/9789240022256</a>                                                                                                                                           | No                               |
| <b>CRI 2003</b> | 16+   | 8    | No  | IVAWS                                                                                                                  | <a href="https://doi.org/10.1007/978-0-387-73204-6">https://doi.org/10.1007/978-0-387-73204-6</a>                                                                                                                                                                   | No                               |
| <b>CRI 2018</b> | 15-49 | 7    | No  | WHO VAW 2018                                                                                                           | <a href="https://www.who.int/publications/i/item/9789240022256">https://www.who.int/publications/i/item/9789240022256</a>                                                                                                                                           | No                               |
| <b>CUB 2018</b> | 15-49 | 5    | No  | WHO VAW 2018                                                                                                           | <a href="https://www.who.int/publications/i/item/9789240022256">https://www.who.int/publications/i/item/9789240022256</a>                                                                                                                                           | No                               |
| <b>CYP 2012</b> | 18-74 | 3    | Yes | calculated by FRA based on available country data from the 2012 FRA Violence against women: an EU-wide Survey          | <a href="https://unstats.un.org/sdgs/indicators/database/">https://unstats.un.org/sdgs/indicators/database/</a>                                                                                                                                                     | No                               |
| <b>CYP 2018</b> | 15-49 | 3    | No  | WHO VAW 2018                                                                                                           | <a href="https://www.who.int/publications/i/item/9789240022256">https://www.who.int/publications/i/item/9789240022256</a>                                                                                                                                           | No                               |
| <b>CZE 2003</b> | 16+   | 9    | No  | IVAWS                                                                                                                  | <a href="https://doi.org/10.1007/978-0-387-73204-6">https://doi.org/10.1007/978-0-387-73204-6</a>                                                                                                                                                                   | No                               |
| <b>CZE 2012</b> | 18-74 | 6    | Yes | calculated by FRA based on available country data from the                                                             | <a href="https://unstats.un.org/sdgs/indicators/database/">https://unstats.un.org/sdgs/indicators/database/</a>                                                                                                                                                     | No                               |

|                 |       |      |     |                                                                                                                                                                                                                                        |                                                                                                                                                                                                                                               |                                  |
|-----------------|-------|------|-----|----------------------------------------------------------------------------------------------------------------------------------------------------------------------------------------------------------------------------------------|-----------------------------------------------------------------------------------------------------------------------------------------------------------------------------------------------------------------------------------------------|----------------------------------|
|                 |       |      |     | 2012 FRA Violence against women: an EU-wide Survey                                                                                                                                                                                     |                                                                                                                                                                                                                                               |                                  |
| <b>CZE 2018</b> | 15-49 | 4    | No  | WHO VAW 2018                                                                                                                                                                                                                           | <a href="https://www.who.int/publications/i/item/9789240022256">https://www.who.int/publications/i/item/9789240022256</a>                                                                                                                     | No                               |
| <b>DEU 2012</b> | 18-74 | 5    | Yes | calculated by FRA based on available country data from the 2012 FRA Violence against women: an EU-wide Survey                                                                                                                          | <a href="https://unstats.un.org/sdgs/indicators/database/">https://unstats.un.org/sdgs/indicators/database/</a>                                                                                                                               | No                               |
| <b>DNK 2003</b> | 16+   | 1    | No  | IVAWS                                                                                                                                                                                                                                  | <a href="https://doi.org/10.1007/978-0-387-73204-6">https://doi.org/10.1007/978-0-387-73204-6</a>                                                                                                                                             | No                               |
| <b>DNK 2012</b> | 18-74 | 7    | Yes | calculated by FRA based on available country data from the 2012 FRA Violence against women: an EU-wide Survey                                                                                                                          | <a href="https://unstats.un.org/sdgs/indicators/database/">https://unstats.un.org/sdgs/indicators/database/</a>                                                                                                                               | No                               |
| <b>DNK 2018</b> | 15-49 | 3    | No  | WHO VAW 2018                                                                                                                                                                                                                           | <a href="https://www.who.int/publications/i/item/9789240022256">https://www.who.int/publications/i/item/9789240022256</a>                                                                                                                     | No                               |
| <b>DOM 2002</b> | 15-49 | 10.4 | No  | DHS                                                                                                                                                                                                                                    | <a href="https://dhsprogram.com/">https://dhsprogram.com/</a>                                                                                                                                                                                 | No                               |
| <b>DOM 2007</b> | 15-49 | 11.7 | No  | DHS                                                                                                                                                                                                                                    | <a href="https://dhsprogram.com/">https://dhsprogram.com/</a>                                                                                                                                                                                 | No                               |
| <b>DOM 2013</b> | 15-49 | 16   | Yes | DHS                                                                                                                                                                                                                                    | <a href="https://unstats.un.org/sdgs/indicators/database/">https://unstats.un.org/sdgs/indicators/database/</a>                                                                                                                               | No                               |
| <b>DOM 2018</b> | 15-49 | 10   | No  | WHO VAW 2018                                                                                                                                                                                                                           | <a href="https://www.who.int/publications/i/item/9789240022256">https://www.who.int/publications/i/item/9789240022256</a>                                                                                                                     | No                               |
| <b>ECU 2004</b> | 15-49 | 11.1 | No  | RHS data reported in PAHO 2012 publication VAW in LAC: Comparative analysis of population-based data from 12 countries                                                                                                                 | <a href="https://iris.paho.org/handle/10665.2/3471">https://iris.paho.org/handle/10665.2/3471</a>                                                                                                                                             | No                               |
| <b>ECU 2011</b> | 15-49 | 10.8 | Yes | PAHO 2018 publication Intimate Partner Violence against Women in the Americas: calculated by PAHO based on available country data from the 2011 Encuesta Nacional sobre Relaciones Familiares y Violencia de Género contra las Mujeres | <a href="https://unstats.un.org/sdgs/indicators/database/">https://unstats.un.org/sdgs/indicators/database/</a>                                                                                                                               | No                               |
| <b>ECU 2018</b> | 15-49 | 8    | No  | WHO VAW 2018                                                                                                                                                                                                                           | <a href="https://www.who.int/publications/i/item/9789240022256">https://www.who.int/publications/i/item/9789240022256</a>                                                                                                                     | No                               |
| <b>EGY 2005</b> | 15-49 | 21.7 | No  | DHS                                                                                                                                                                                                                                    | <a href="https://dhsprogram.com/">https://dhsprogram.com/</a>                                                                                                                                                                                 | No                               |
| <b>EGY 2014</b> | 15-49 | 14   | Yes | DHS                                                                                                                                                                                                                                    | <a href="https://unstats.un.org/sdgs/indicators/database/">https://unstats.un.org/sdgs/indicators/database/</a>                                                                                                                               | No                               |
| <b>EGY 2018</b> | 15-49 | 15   | No  | WHO VAW 2018                                                                                                                                                                                                                           | <a href="https://www.who.int/publications/i/item/9789240022256">https://www.who.int/publications/i/item/9789240022256</a>                                                                                                                     | No                               |
| <b>ESP 2012</b> | 18-74 | 2    | Yes | calculated by FRA based on available country data from the 2012 FRA Violence against women: an EU-wide Survey                                                                                                                          | <a href="https://unstats.un.org/sdgs/indicators/database/">https://unstats.un.org/sdgs/indicators/database/</a>                                                                                                                               | No                               |
| <b>ESP 2018</b> | 15-49 | 3    | No  | WHO VAW 2018                                                                                                                                                                                                                           | <a href="https://www.who.int/publications/i/item/9789240022256">https://www.who.int/publications/i/item/9789240022256</a>                                                                                                                     | No                               |
| <b>EST 2012</b> | 18-74 | 4    | Yes | calculated by FRA based on available country data from the 2012 FRA Violence against women: an EU-wide Survey                                                                                                                          | <a href="https://unstats.un.org/sdgs/indicators/database/">https://unstats.un.org/sdgs/indicators/database/</a>                                                                                                                               | No                               |
| <b>EST 2018</b> | 15-49 | 4    | No  | WHO VAW 2018                                                                                                                                                                                                                           | <a href="https://www.who.int/publications/i/item/9789240022256">https://www.who.int/publications/i/item/9789240022256</a>                                                                                                                     | No                               |
| <b>ETH 2003</b> | 15-49 | 53.7 | No  | WHO multi-country study (Garcia-Moreno et al., 2006)                                                                                                                                                                                   | <a href="https://www.who.int/gender/violence/who_multicountry_study/media_corner/Prevalence_intimatepartner_WHOStudy.pdf">https://www.who.int/gender/violence/who_multicountry_study/media_corner/Prevalence_intimatepartner_WHOStudy.pdf</a> | Yes - based on one estimate only |
| <b>ETH 2016</b> | 15-49 | 19.8 | Yes | DHS                                                                                                                                                                                                                                    | <a href="https://unstats.un.org/sdgs/indicators/database/">https://unstats.un.org/sdgs/indicators/database/</a>                                                                                                                               | No                               |

|                 |       |      |     |                                                                                                               |                                                                                                                                                                                   |                                                                                                                                                                                                               |
|-----------------|-------|------|-----|---------------------------------------------------------------------------------------------------------------|-----------------------------------------------------------------------------------------------------------------------------------------------------------------------------------|---------------------------------------------------------------------------------------------------------------------------------------------------------------------------------------------------------------|
| <b>ETH 2018</b> | 15-49 | 27   | No  | WHO VAW 2018                                                                                                  | <a href="https://www.who.int/publications/i/item/9789240022256">https://www.who.int/publications/i/item/9789240022256</a>                                                         | No                                                                                                                                                                                                            |
| <b>FIN 2012</b> | 18-74 | 8    | Yes | calculated by FRA based on available country data from the 2012 FRA Violence against women: an EU-wide Survey | <a href="https://unstats.un.org/sdgs/indicators/database/">https://unstats.un.org/sdgs/indicators/database/</a>                                                                   | No                                                                                                                                                                                                            |
| <b>FIN 2018</b> | 15-49 | 8    | No  | WHO VAW 2018                                                                                                  | <a href="https://www.who.int/publications/i/item/9789240022256">https://www.who.int/publications/i/item/9789240022256</a>                                                         | No                                                                                                                                                                                                            |
| <b>FJI 2011</b> | 18-49 | 29.7 | Yes | National Research on Women's Health and Life Experiences in Fiji (2010/2011)                                  | <a href="https://unstats.un.org/sdgs/indicators/database/">https://unstats.un.org/sdgs/indicators/database/</a>                                                                   | No                                                                                                                                                                                                            |
| <b>FJI 2018</b> | 15-49 | 23   | No  | WHO VAW 2018                                                                                                  | <a href="https://www.who.int/publications/i/item/9789240022256">https://www.who.int/publications/i/item/9789240022256</a>                                                         | No                                                                                                                                                                                                            |
| <b>FRA 2000</b> | 16+   | 10   | No  | IVAWS                                                                                                         | <a href="https://doi.org/10.1007/978-0-387-73204-6">https://doi.org/10.1007/978-0-387-73204-6</a>                                                                                 | No                                                                                                                                                                                                            |
| <b>FRA 2007</b> | 18-59 | 3.3  | No  | Other (via UN Women Matrix; not clear from report if figure is actually for lifetime rather than last 12m)    | <a href="https://www.endvawnow.org/uploads/browser/files/vawprevalence_matrix_june2013.pdf">https://www.endvawnow.org/uploads/browser/files/vawprevalence_matrix_june2013.pdf</a> | Tournyol du Clos, L., Institut national des hautes études de sécurité, et Le Jeannic, T., division Conditions de vie des ménages, Insee. 2008. Les violences faites aux femmes. Insee Première N°1180. Paris. |
| <b>FRA 2012</b> | 18-74 | 7    | Yes | calculated by FRA based on available country data from the 2012 FRA Violence against women: an EU-wide Survey | <a href="https://unstats.un.org/sdgs/indicators/database/">https://unstats.un.org/sdgs/indicators/database/</a>                                                                   | No                                                                                                                                                                                                            |
| <b>FRA 2018</b> | 15-49 | 5    | No  | WHO VAW 2018                                                                                                  | <a href="https://www.who.int/publications/i/item/9789240022256">https://www.who.int/publications/i/item/9789240022256</a>                                                         | No                                                                                                                                                                                                            |
| <b>FSM 2014</b> | 15-64 | 26   | Yes | Federated States of Micronesia Family Health and Safety Study                                                 | <a href="https://unstats.un.org/sdgs/indicators/database/">https://unstats.un.org/sdgs/indicators/database/</a>                                                                   | No                                                                                                                                                                                                            |
| <b>FSM 2018</b> | 15-49 | 21   | No  | WHO VAW 2018                                                                                                  | <a href="https://www.who.int/publications/i/item/9789240022256">https://www.who.int/publications/i/item/9789240022256</a>                                                         | No                                                                                                                                                                                                            |
| <b>GAB 2012</b> | 15-49 | 31.5 | Yes | DHS                                                                                                           | <a href="https://unstats.un.org/sdgs/indicators/database/">https://unstats.un.org/sdgs/indicators/database/</a>                                                                   | No                                                                                                                                                                                                            |
| <b>GAB 2018</b> | 15-49 | 22   | No  | WHO VAW 2018                                                                                                  | <a href="https://www.who.int/publications/i/item/9789240022256">https://www.who.int/publications/i/item/9789240022256</a>                                                         | No                                                                                                                                                                                                            |
| <b>GBR 2005</b> | 16-59 | 5.9  | No  | Other* (via UN Women matrix but could not find equivalent statistic in report)                                | <a href="https://www.endvawnow.org/uploads/browser/files/vawprevalence_matrix_june2013.pdf">https://www.endvawnow.org/uploads/browser/files/vawprevalence_matrix_june2013.pdf</a> | British Crime Survey                                                                                                                                                                                          |
| <b>GBR 2012</b> | 18-74 | 6    | Yes | calculated by FRA based on available country data from the 2012 FRA Violence against women: an EU-wide Survey | <a href="https://unstats.un.org/sdgs/indicators/database/">https://unstats.un.org/sdgs/indicators/database/</a>                                                                   | No                                                                                                                                                                                                            |
| <b>GBR 2018</b> | 15-49 | 4    | No  | WHO VAW 2018                                                                                                  | <a href="https://www.who.int/publications/i/item/9789240022256">https://www.who.int/publications/i/item/9789240022256</a>                                                         | No                                                                                                                                                                                                            |
| <b>GEO 2005</b> | 15-44 | 2    | No  | RHS (via UN Women matrix)                                                                                     | <a href="https://www.endvawnow.org/uploads/browser/files/vawprevalence_matrix_june2013.pdf">https://www.endvawnow.org/uploads/browser/files/vawprevalence_matrix_june2013.pdf</a> | No                                                                                                                                                                                                            |
| <b>GEO 2018</b> | 15-49 | 3    | No  | WHO VAW 2018                                                                                                  | <a href="https://www.who.int/publications/i/item/9789240022256">https://www.who.int/publications/i/item/9789240022256</a>                                                         | No                                                                                                                                                                                                            |
| <b>GHA 2008</b> | 15-49 | 20   | No  | DHS (corrected from 19.2 to 20.0 after checking DHS report)                                                   | <a href="https://dhsprogram.com/">https://dhsprogram.com/</a>                                                                                                                     | No                                                                                                                                                                                                            |
| <b>GHA 2018</b> | 15-49 | 10   | No  | WHO VAW 2018                                                                                                  | <a href="https://www.who.int/publications/i/item/9789240022256">https://www.who.int/publications/i/item/9789240022256</a>                                                         | No                                                                                                                                                                                                            |
| <b>GIN 2018</b> | 15-49 | 21   | No  | WHO VAW 2018                                                                                                  | <a href="https://www.who.int/publications/i/item/9789240022256">https://www.who.int/publications/i/item/9789240022256</a>                                                         | No                                                                                                                                                                                                            |
| <b>GMB 2013</b> | 15-49 | 7.3  | Yes | DHS                                                                                                           | <a href="https://unstats.un.org/sdgs/indicators/database/">https://unstats.un.org/sdgs/indicators/database/</a>                                                                   | No                                                                                                                                                                                                            |
| <b>GMB 2018</b> | 15-49 | 10   | No  | WHO VAW 2018                                                                                                  | <a href="https://www.who.int/publications/i/item/9789240022256">https://www.who.int/publications/i/item/9789240022256</a>                                                         | No                                                                                                                                                                                                            |

|                 |       |      |     |                                                                                                                        |                                                                                                                                                                                   |    |
|-----------------|-------|------|-----|------------------------------------------------------------------------------------------------------------------------|-----------------------------------------------------------------------------------------------------------------------------------------------------------------------------------|----|
| <b>GNQ 2011</b> | 15-49 | 43.6 | Yes | DHS                                                                                                                    | <a href="https://unstats.un.org/sdgs/indicators/database/">https://unstats.un.org/sdgs/indicators/database/</a>                                                                   | No |
| <b>GNQ 2018</b> | 15-49 | 29   | No  | WHO VAW 2018                                                                                                           | <a href="https://www.who.int/publications/i/item/9789240022256">https://www.who.int/publications/i/item/9789240022256</a>                                                         | No |
| <b>GRC 2012</b> | 18-74 | 8    | Yes | calculated by FRA based on available country data from the 2012 FRA Violence against women: an EU-wide Survey          | <a href="https://unstats.un.org/sdgs/indicators/database/">https://unstats.un.org/sdgs/indicators/database/</a>                                                                   | No |
| <b>GRC 2018</b> | 15-49 | 5    | No  | WHO VAW 2018                                                                                                           | <a href="https://www.who.int/publications/i/item/9789240022256">https://www.who.int/publications/i/item/9789240022256</a>                                                         | No |
| <b>GRD 2018</b> | 15-49 | 8    | No  | WHO VAW 2018                                                                                                           | <a href="https://www.who.int/publications/i/item/9789240022256">https://www.who.int/publications/i/item/9789240022256</a>                                                         | No |
| <b>GTM 2009</b> | 15-49 | 9.9  | No  | RHS (via UN Women matrix)                                                                                              | <a href="https://www.endvawnow.org/uploads/browser/files/vawprevalence_matrix_june2013.pdf">https://www.endvawnow.org/uploads/browser/files/vawprevalence_matrix_june2013.pdf</a> | No |
| <b>GTM 2015</b> | 15-49 | 8.5  | No  | ENSMI (DHS) (Corrected from 8.9 to 8.5 after checking DHS report)                                                      | <a href="https://dhsprogram.com/">https://dhsprogram.com/</a>                                                                                                                     | No |
| <b>GTM 2018</b> | 15-49 | 7    | No  | WHO VAW 2018                                                                                                           | <a href="https://www.who.int/publications/i/item/9789240022256">https://www.who.int/publications/i/item/9789240022256</a>                                                         | No |
| <b>GUY 2018</b> | 15-49 | 10   | No  | WHO VAW 2018                                                                                                           | <a href="https://www.who.int/publications/i/item/9789240022256">https://www.who.int/publications/i/item/9789240022256</a>                                                         | No |
| <b>HKG 2005</b> | 16+   | 2    | No  | IVAWS                                                                                                                  | <a href="https://doi.org/10.1007/978-0-387-73204-6">https://doi.org/10.1007/978-0-387-73204-6</a>                                                                                 | No |
| <b>HKG 2018</b> | 15-49 | 3    | No  | WHO VAW 2018                                                                                                           | <a href="https://www.who.int/publications/i/item/9789240022256">https://www.who.int/publications/i/item/9789240022256</a>                                                         | No |
| <b>HND 2006</b> | 15-49 | 9.9  | No  | DHS data reported in PAHO 2012 publication VAW in LAC: Comparative analysis of population-based data from 12 countries | <a href="https://iris.paho.org/handle/10665.2/3471">https://iris.paho.org/handle/10665.2/3471</a>                                                                                 | No |
| <b>HND 2012</b> | 15-49 | 10.9 | No  | DHS (corrected from 11 to 10.9 after checking DHS report)                                                              | <a href="https://dhsprogram.com/">https://dhsprogram.com/</a>                                                                                                                     | No |
| <b>HND 2018</b> | 15-49 | 7    | No  | WHO VAW 2018                                                                                                           | <a href="https://www.who.int/publications/i/item/9789240022256">https://www.who.int/publications/i/item/9789240022256</a>                                                         | No |
| <b>HRV 2012</b> | 18-74 | 4    | Yes | calculated by FRA based on available country data from the 2012 FRA Violence against women: an EU-wide Survey          | <a href="https://unstats.un.org/sdgs/indicators/database/">https://unstats.un.org/sdgs/indicators/database/</a>                                                                   | No |
| <b>HRV 2018</b> | 15-49 | 4    | No  | WHO VAW 2018                                                                                                           | <a href="https://www.who.int/publications/i/item/9789240022256">https://www.who.int/publications/i/item/9789240022256</a>                                                         | No |
| <b>HTI 2000</b> | 15-49 | 20.7 | No  | DHS                                                                                                                    | <a href="https://dhsprogram.com/">https://dhsprogram.com/</a>                                                                                                                     | No |
| <b>HTI 2006</b> | 15-49 | 16.8 | No  | DHS                                                                                                                    | <a href="https://dhsprogram.com/">https://dhsprogram.com/</a>                                                                                                                     | No |
| <b>HTI 2012</b> | 15-49 | 14.9 | No  | DHS                                                                                                                    | <a href="https://dhsprogram.com/">https://dhsprogram.com/</a>                                                                                                                     | No |
| <b>HTI 2017</b> | 15-49 | 13.9 | Yes | DHS                                                                                                                    | <a href="https://unstats.un.org/sdgs/indicators/database/">https://unstats.un.org/sdgs/indicators/database/</a>                                                                   | No |
| <b>HTI 2018</b> | 15-49 | 12   | No  | WHO VAW 2018                                                                                                           | <a href="https://www.who.int/publications/i/item/9789240022256">https://www.who.int/publications/i/item/9789240022256</a>                                                         | No |
| <b>HUN 2012</b> | 18-74 | 8    | Yes | calculated by FRA based on available country data from the 2012 FRA Violence against women: an EU-wide Survey          | <a href="https://unstats.un.org/sdgs/indicators/database/">https://unstats.un.org/sdgs/indicators/database/</a>                                                                   | No |
| <b>HUN 2018</b> | 15-49 | 6    | No  | WHO VAW 2018                                                                                                           | <a href="https://www.who.int/publications/i/item/9789240022256">https://www.who.int/publications/i/item/9789240022256</a>                                                         | No |
| <b>IDN 2018</b> | 15-49 | 9    | No  | WHO VAW 2018                                                                                                           | <a href="https://www.who.int/publications/i/item/9789240022256">https://www.who.int/publications/i/item/9789240022256</a>                                                         | No |
| <b>IND 2006</b> | 15-49 | 23.9 | No  | DHS                                                                                                                    | <a href="https://dhsprogram.com/">https://dhsprogram.com/</a>                                                                                                                     | No |
| <b>IND 2016</b> | 15-49 | 23.7 | No  | NFHS (DHS) - corrected to 23.7 from 22 after checking report                                                           | <a href="https://dhsprogram.com/">https://dhsprogram.com/</a>                                                                                                                     | No |
| <b>IND 2018</b> | 15-49 | 18   | No  | WHO VAW 2018                                                                                                           | <a href="https://www.who.int/publications/i/item/9789240022256">https://www.who.int/publications/i/item/9789240022256</a>                                                         | No |
| <b>IRL 2012</b> | 18-74 | 4    | Yes | calculated by FRA based on available country data from the                                                             | <a href="https://unstats.un.org/sdgs/indicators/database/">https://unstats.un.org/sdgs/indicators/database/</a>                                                                   | No |

|                 |       |      |     |                                                                                                               |                                                                                                                                                                                                                                               |                                                                                                                                                                                                                                                 |                                  |
|-----------------|-------|------|-----|---------------------------------------------------------------------------------------------------------------|-----------------------------------------------------------------------------------------------------------------------------------------------------------------------------------------------------------------------------------------------|-------------------------------------------------------------------------------------------------------------------------------------------------------------------------------------------------------------------------------------------------|----------------------------------|
|                 |       |      |     | 2012 FRA Violence against women: an EU-wide Survey                                                            |                                                                                                                                                                                                                                               |                                                                                                                                                                                                                                                 |                                  |
| <b>IRL 2018</b> | 15-49 | 3    | No  | WHO VAW 2018                                                                                                  | <a href="https://www.who.int/publications/i/item/9789240022256">https://www.who.int/publications/i/item/9789240022256</a>                                                                                                                     |                                                                                                                                                                                                                                                 | No                               |
| <b>IRN 2018</b> | 15-49 | 18   | No  | WHO VAW 2018                                                                                                  | <a href="https://www.who.int/publications/i/item/9789240022256">https://www.who.int/publications/i/item/9789240022256</a>                                                                                                                     |                                                                                                                                                                                                                                                 | No                               |
| <b>ISL 2008</b> | 18-80 | 2    | No  | Other (via UN Women Global Database on Violence against Women)                                                | <a href="https://evaw-global-database.unwomen.org/en">https://evaw-global-database.unwomen.org/en</a>                                                                                                                                         | Ingólfur Gíslason, 2008. Ofbeldi í nánnum samböndum: orsakir, afleiðingar, úrræði [Violence in intimate relationships: causes, consequences, remedies]. Reykjavík: Félagsmálaráðuneytið (Ministry of Social Affairs – now Ministry for Welfare) | No                               |
| <b>ISL 2018</b> | 15-49 | 3    | No  | WHO VAW 2018                                                                                                  | <a href="https://www.who.int/publications/i/item/9789240022256">https://www.who.int/publications/i/item/9789240022256</a>                                                                                                                     |                                                                                                                                                                                                                                                 | No                               |
| <b>ISR 2018</b> | 15-49 | 6    | No  | WHO VAW 2018                                                                                                  | <a href="https://www.who.int/publications/i/item/9789240022256">https://www.who.int/publications/i/item/9789240022256</a>                                                                                                                     |                                                                                                                                                                                                                                                 | No                               |
| <b>ITA 2006</b> | 16+   | 2.4  | No  | IVAWS                                                                                                         | <a href="https://doi.org/10.1007/978-0-387-73204-6">https://doi.org/10.1007/978-0-387-73204-6</a>                                                                                                                                             |                                                                                                                                                                                                                                                 | No                               |
| <b>ITA 2012</b> | 18-74 | 7    | Yes | calculated by FRA based on available country data from the 2012 FRA Violence against women: an EU-wide Survey | <a href="https://unstats.un.org/sdgs/indicators/database/">https://unstats.un.org/sdgs/indicators/database/</a>                                                                                                                               |                                                                                                                                                                                                                                                 | No                               |
| <b>ITA 2018</b> | 15-49 | 4    | No  | WHO VAW 2018                                                                                                  | <a href="https://www.who.int/publications/i/item/9789240022256">https://www.who.int/publications/i/item/9789240022256</a>                                                                                                                     |                                                                                                                                                                                                                                                 | No                               |
| <b>JAM 2009</b> | 15-49 | 7.7  | No  | RHS (via UN Women matrix)                                                                                     | <a href="https://www.endvawnow.org/uploads/browser/files/vawprevalence_matrix_june2013.pdf">https://www.endvawnow.org/uploads/browser/files/vawprevalence_matrix_june2013.pdf</a>                                                             |                                                                                                                                                                                                                                                 | No                               |
| <b>JAM 2016</b> | 15-64 | 8.52 | Yes | Calculated by UN Women based on available country data from the Women's Health Survey 2016                    | <a href="https://unstats.un.org/sdgs/indicators/database/">https://unstats.un.org/sdgs/indicators/database/</a>                                                                                                                               |                                                                                                                                                                                                                                                 | No                               |
| <b>JAM 2018</b> | 15-49 | 7    | No  | WHO VAW 2018                                                                                                  | <a href="https://www.who.int/publications/i/item/9789240022256">https://www.who.int/publications/i/item/9789240022256</a>                                                                                                                     |                                                                                                                                                                                                                                                 | No                               |
| <b>JOR 2007</b> | 15-49 | 14.6 | No  | DHS                                                                                                           | <a href="https://dhsprogram.com/">https://dhsprogram.com/</a>                                                                                                                                                                                 |                                                                                                                                                                                                                                                 | No                               |
| <b>JOR 2012</b> | 15-49 | 14.1 | Yes | DHS                                                                                                           | <a href="https://unstats.un.org/sdgs/indicators/database/">https://unstats.un.org/sdgs/indicators/database/</a>                                                                                                                               |                                                                                                                                                                                                                                                 | No                               |
| <b>JOR 2018</b> | 15-49 | 13.8 | No  | DHS                                                                                                           | <a href="https://dhsprogram.com/">https://dhsprogram.com/</a>                                                                                                                                                                                 |                                                                                                                                                                                                                                                 | No                               |
| <b>JPN 2003</b> | 18-49 | 3.8  | No  | WHO multi-country study (Garcia-Moreno et al., 2006)                                                          | <a href="https://www.who.int/gender/violence/who_multicountry_study/media_corner/Prevalence_intimatepartner_WHOStudy.pdf">https://www.who.int/gender/violence/who_multicountry_study/media_corner/Prevalence_intimatepartner_WHOStudy.pdf</a> |                                                                                                                                                                                                                                                 | Yes - based on one estimate only |
| <b>JPN 2018</b> | 15-49 | 4    | No  | WHO VAW 2018                                                                                                  | <a href="https://www.who.int/publications/i/item/9789240022256">https://www.who.int/publications/i/item/9789240022256</a>                                                                                                                     |                                                                                                                                                                                                                                                 | No                               |
| <b>KAZ 2011</b> | 15-49 | 15.7 | No  | MICS                                                                                                          | <a href="http://mics.unicef.org/surveys">http://mics.unicef.org/surveys</a>                                                                                                                                                                   |                                                                                                                                                                                                                                                 | No                               |
| <b>KAZ 2015</b> | 18-75 | 4.7  | No  | Other (via UN Women Global Database on Violence against Women)                                                | <a href="https://evaw-global-database.unwomen.org/en">https://evaw-global-database.unwomen.org/en</a>                                                                                                                                         | Statistics Committee of the Ministry of National Economy. 2017. Sample Survey on Violence Against Women in Kazakhstan. Astana, Kazakhstan: Statistics Committee of the Ministry of National Economy of RK.                                      | No                               |
| <b>KAZ 2018</b> | 15-49 | 6    | No  | WHO VAW 2018                                                                                                  | <a href="https://www.who.int/publications/i/item/9789240022256">https://www.who.int/publications/i/item/9789240022256</a>                                                                                                                     |                                                                                                                                                                                                                                                 | No                               |
| <b>KEN 2003</b> | 15-49 | 28.2 | No  | DHS                                                                                                           | <a href="https://dhsprogram.com/">https://dhsprogram.com/</a>                                                                                                                                                                                 |                                                                                                                                                                                                                                                 | No                               |
| <b>KEN 2009</b> | 15-49 | 34   | No  | DHS                                                                                                           | <a href="https://dhsprogram.com/">https://dhsprogram.com/</a>                                                                                                                                                                                 |                                                                                                                                                                                                                                                 | No                               |
| <b>KEN 2014</b> | 15-49 | 25.5 | Yes | DHS                                                                                                           | <a href="https://unstats.un.org/sdgs/indicators/database/">https://unstats.un.org/sdgs/indicators/database/</a>                                                                                                                               |                                                                                                                                                                                                                                                 | No                               |

|                 |       |      |     |                                                                                                               |                                                                                                                                                                                                                                                                                         |                                                                                                                        |
|-----------------|-------|------|-----|---------------------------------------------------------------------------------------------------------------|-----------------------------------------------------------------------------------------------------------------------------------------------------------------------------------------------------------------------------------------------------------------------------------------|------------------------------------------------------------------------------------------------------------------------|
| <b>KEN 2018</b> | 15-49 | 23   | No  | WHO VAW 2018                                                                                                  | <a href="https://www.who.int/publications/i/item/9789240022256">ors/database/<br/>https://www.who.int/publications/<br/>i/item/9789240022256</a>                                                                                                                                        | No                                                                                                                     |
| <b>KGZ 2012</b> | 15-49 | 17.1 | Yes | DHS                                                                                                           | <a href="https://unstats.un.org/sdgs/indicators/database/">https://unstats.un.org/sdgs/indicators/<br/>database/</a>                                                                                                                                                                    | No                                                                                                                     |
| <b>KGZ 2018</b> | 15-49 | 13   | No  | WHO VAW 2018                                                                                                  | <a href="https://www.who.int/publications/i/item/9789240022256">https://www.who.int/publications/<br/>i/item/9789240022256</a>                                                                                                                                                          | No                                                                                                                     |
| <b>KHM 2000</b> | 15-49 | 15.2 | No  | DHS                                                                                                           | <a href="https://dhsprogram.com/">https://dhsprogram.com/</a>                                                                                                                                                                                                                           | No                                                                                                                     |
| <b>KHM 2005</b> | 15-49 | 8.7  | No  | DHS                                                                                                           | <a href="https://dhsprogram.com/">https://dhsprogram.com/</a>                                                                                                                                                                                                                           | No                                                                                                                     |
| <b>KHM 2013</b> | 18-49 | 3.2  | No  | UNMCS                                                                                                         | <a href="https://svri.org/sites/default/files/attachments/2018-05-09/Why%20do%20some%20men%20use%20violence%20against%20women_1.pdf">https://svri.org/sites/default/files/a<br/>ttachments/2018-05-<br/>09/Why%20do%20some%20men<br/>%20use%20violence%20against<br/>%20women_1.pdf</a> | No                                                                                                                     |
| <b>KHM 2014</b> | 15-49 | 10.9 | Yes | DHS                                                                                                           | <a href="https://unstats.un.org/sdgs/indicators/database/">https://unstats.un.org/sdgs/indicators/<br/>database/</a>                                                                                                                                                                    | No                                                                                                                     |
| <b>KHM 2018</b> | 15-49 | 9    | No  | WHO VAW 2018                                                                                                  | <a href="https://www.who.int/publications/i/item/9789240022256">https://www.who.int/publications/<br/>i/item/9789240022256</a>                                                                                                                                                          | No                                                                                                                     |
| <b>KIR 2008</b> | 15-49 | 36.1 | Yes | Family Health and Support Study                                                                               | <a href="https://unstats.un.org/sdgs/indicators/database/">https://unstats.un.org/sdgs/indicators/<br/>database/</a>                                                                                                                                                                    | No                                                                                                                     |
| <b>KIR 2018</b> | 15-49 | 25   | No  | WHO VAW 2018                                                                                                  | <a href="https://www.who.int/publications/i/item/9789240022256">https://www.who.int/publications/<br/>i/item/9789240022256</a>                                                                                                                                                          | No                                                                                                                     |
| <b>KIR 2019</b> | 15-49 | 43.4 | No  | MICS                                                                                                          | <a href="http://mics.unicef.org/surveys">http://mics.unicef.org/surveys</a>                                                                                                                                                                                                             | No                                                                                                                     |
| <b>KOR 2018</b> | 15-49 | 8    | No  | WHO VAW 2018                                                                                                  | <a href="https://www.who.int/publications/i/item/9789240022256">https://www.who.int/publications/<br/>i/item/9789240022256</a>                                                                                                                                                          | No                                                                                                                     |
| <b>LAO 2014</b> | 15-64 | 6.4  | Yes | Lao National Survey on Women's Health and Life Experiences                                                    | <a href="https://unstats.un.org/sdgs/indicators/database/">https://unstats.un.org/sdgs/indicators/<br/>database/</a>                                                                                                                                                                    | No                                                                                                                     |
| <b>LAO 2018</b> | 15-49 | 8    | No  | WHO VAW 2018                                                                                                  | <a href="https://www.who.int/publications/i/item/9789240022256">https://www.who.int/publications/<br/>i/item/9789240022256</a>                                                                                                                                                          | No                                                                                                                     |
| <b>LBR 2007</b> | 15-49 | 36.3 | No  | DHS (corrected from 35 to 36.3 after checking DHS report)                                                     | <a href="https://dhsprogram.com/">https://dhsprogram.com/</a>                                                                                                                                                                                                                           | No                                                                                                                     |
| <b>LBR 2018</b> | 15-49 | 27   | No  | WHO VAW 2018                                                                                                  | <a href="https://www.who.int/publications/i/item/9789240022256">https://www.who.int/publications/<br/>i/item/9789240022256</a>                                                                                                                                                          | No                                                                                                                     |
| <b>LKA 2013</b> | 18-49 | 1.5  | No  | UNMCS                                                                                                         | <a href="https://svri.org/sites/default/files/attachments/2018-05-09/Why%20do%20some%20men%20use%20violence%20against%20women_1.pdf">https://svri.org/sites/default/files/a<br/>ttachments/2018-05-<br/>09/Why%20do%20some%20men<br/>%20use%20violence%20against<br/>%20women_1.pdf</a> | No                                                                                                                     |
| <b>LKA 2018</b> | 15-49 | 4    | No  | WHO VAW 2018                                                                                                  | <a href="https://www.who.int/publications/i/item/9789240022256">https://www.who.int/publications/<br/>i/item/9789240022256</a>                                                                                                                                                          | No                                                                                                                     |
| <b>LSO 2018</b> | 15-49 | 16   | No  | WHO VAW 2018                                                                                                  | <a href="https://www.who.int/publications/i/item/9789240022256">https://www.who.int/publications/<br/>i/item/9789240022256</a>                                                                                                                                                          | No                                                                                                                     |
| <b>LTU 2012</b> | 18-74 | 6    | Yes | calculated by FRA based on available country data from the 2012 FRA Violence against women: an EU-wide Survey | <a href="https://unstats.un.org/sdgs/indicators/database/">https://unstats.un.org/sdgs/indicators/<br/>database/</a>                                                                                                                                                                    | No                                                                                                                     |
| <b>LTU 2018</b> | 15-49 | 5    | No  | WHO VAW 2018                                                                                                  | <a href="https://www.who.int/publications/i/item/9789240022256">https://www.who.int/publications/<br/>i/item/9789240022256</a>                                                                                                                                                          | No                                                                                                                     |
| <b>LUX 2012</b> | 18-74 | 3    | Yes | calculated by FRA based on available country data from the 2012 FRA Violence against women: an EU-wide Survey | <a href="https://unstats.un.org/sdgs/indicators/database/">https://unstats.un.org/sdgs/indicators/<br/>database/</a>                                                                                                                                                                    | No                                                                                                                     |
| <b>LUX 2018</b> | 15-49 | 4    | No  | WHO VAW 2018                                                                                                  | <a href="https://www.who.int/publications/i/item/9789240022256">https://www.who.int/publications/<br/>i/item/9789240022256</a>                                                                                                                                                          | No                                                                                                                     |
| <b>LVA 2012</b> | 18-74 | 7    | Yes | calculated by FRA based on available country data from the 2012 FRA Violence against women: an EU-wide Survey | <a href="https://unstats.un.org/sdgs/indicators/database/">https://unstats.un.org/sdgs/indicators/<br/>database/</a>                                                                                                                                                                    | No                                                                                                                     |
| <b>LVA 2018</b> | 15-49 | 6    | No  | WHO VAW 2018                                                                                                  | <a href="https://www.who.int/publications/i/item/9789240022256">https://www.who.int/publications/<br/>i/item/9789240022256</a>                                                                                                                                                          | No                                                                                                                     |
| <b>MAR 2010</b> | 18-64 | 11.5 | No  | Other (via UN Women matrix)                                                                                   | <a href="https://www.endvawnow.org/uploads/browser/files/vawprevalence_matrix_june2013.pdf">https://www.endvawnow.org/uplo<br/>ads/browser/files/vawprevalence<br/>matrix_june2013.pdf</a>                                                                                              | Moroccan High Commission of Planning. 2012. Enquête nationale sur la prévalence de la violence à l'égard des femmes au |



|                 |       |      |     |                                                                                                                                                         |                                                                                                                                                                                   |                                                                    |
|-----------------|-------|------|-----|---------------------------------------------------------------------------------------------------------------------------------------------------------|-----------------------------------------------------------------------------------------------------------------------------------------------------------------------------------|--------------------------------------------------------------------|
|                 |       |      |     |                                                                                                                                                         |                                                                                                                                                                                   | Maroc: 2009.<br>Morrocan High<br>Commission of<br>Planning. Rabat. |
| <b>MAR 2018</b> | 15-49 | 10   | No  | WHO VAW 2018                                                                                                                                            | <a href="https://www.who.int/publications/i/item/9789240022256">https://www.who.int/publications/i/item/9789240022256</a>                                                         | No                                                                 |
| <b>MDA 2005</b> | 15-49 | 14.6 | Yes | DHS                                                                                                                                                     | <a href="https://unstats.un.org/sdgs/indicators/database/">https://unstats.un.org/sdgs/indicators/database/</a>                                                                   | No                                                                 |
| <b>MDA 2018</b> | 15-49 | 9    | No  | WHO VAW 2018                                                                                                                                            | <a href="https://www.who.int/publications/i/item/9789240022256">https://www.who.int/publications/i/item/9789240022256</a>                                                         | No                                                                 |
| <b>MDG 2018</b> | 15-49 | 16   | No  | MICS                                                                                                                                                    | <a href="http://mics.unicef.org/surveys">http://mics.unicef.org/surveys</a>                                                                                                       | No                                                                 |
| <b>MDV 2006</b> | 15-49 | 6.4  | Yes | Study on Women's Health and Life Experiences                                                                                                            | <a href="https://unstats.un.org/sdgs/indicators/database/">https://unstats.un.org/sdgs/indicators/database/</a>                                                                   | No                                                                 |
| <b>MDV 2016</b> | 15-49 | 5.6  | No  | DHS                                                                                                                                                     | <a href="https://dhsprogram.com/">https://dhsprogram.com/</a>                                                                                                                     | No                                                                 |
| <b>MDV 2018</b> | 15-49 | 6    | No  | WHO VAW 2018                                                                                                                                            | <a href="https://www.who.int/publications/i/item/9789240022256">https://www.who.int/publications/i/item/9789240022256</a>                                                         | No                                                                 |
| <b>MEX 2016</b> | 15+   | 9.5  | Yes | PAHO 2018 publication Intimate Partner Violence against Women in the Americas: calculated by PAHO based on available country data from the 2016 ENDIREH | <a href="https://unstats.un.org/sdgs/indicators/database/">https://unstats.un.org/sdgs/indicators/database/</a>                                                                   | No                                                                 |
| <b>MEX 2018</b> | 15-49 | 10   | No  | WHO VAW 2018                                                                                                                                            | <a href="https://www.who.int/publications/i/item/9789240022256">https://www.who.int/publications/i/item/9789240022256</a>                                                         | No                                                                 |
| <b>MHL 2007</b> | 15-49 | 24.7 | No  | DHS (via UN Women matrix)                                                                                                                               | <a href="https://www.endvawnow.org/uploads/browser/files/vawprevalence_matrix_june2013.pdf">https://www.endvawnow.org/uploads/browser/files/vawprevalence_matrix_june2013.pdf</a> | No                                                                 |
| <b>MHL 2014</b> | 15-64 | 20.1 | Yes | Republic of the Marshall Islands National Study on Family Health and Safety                                                                             | <a href="https://unstats.un.org/sdgs/indicators/database/">https://unstats.un.org/sdgs/indicators/database/</a>                                                                   | No                                                                 |
| <b>MHL 2018</b> | 15-49 | 19   | No  | WHO VAW 2018                                                                                                                                            | <a href="https://www.who.int/publications/i/item/9789240022256">https://www.who.int/publications/i/item/9789240022256</a>                                                         | No                                                                 |
| <b>MKD 2018</b> | 15-49 | 4    | No  | WHO VAW 2018                                                                                                                                            | <a href="https://www.who.int/publications/i/item/9789240022256">https://www.who.int/publications/i/item/9789240022256</a>                                                         | No                                                                 |
| <b>MLI 2006</b> | 15-49 | 21.5 | Yes | DHS* (I couldn't find this in DHS report)                                                                                                               | <a href="https://unstats.un.org/sdgs/indicators/database/">https://unstats.un.org/sdgs/indicators/database/</a>                                                                   | No                                                                 |
| <b>MLI 2013</b> | 15-49 | 26.9 | No  | DHS                                                                                                                                                     | <a href="https://dhsprogram.com/">https://dhsprogram.com/</a>                                                                                                                     | No                                                                 |
| <b>MLI 2018</b> | 15-49 | 20.9 | No  | DHS                                                                                                                                                     | <a href="https://dhsprogram.com/">https://dhsprogram.com/</a>                                                                                                                     | No                                                                 |
| <b>MLT 2010</b> | 18-59 | 13.6 | No  | WHO (UN Women matrix) / Study on the Prevalence of Domestic Violence against Women in Malta*                                                            | <a href="https://www.endvawnow.org/uploads/browser/files/vawprevalence_matrix_june2013.pdf">https://www.endvawnow.org/uploads/browser/files/vawprevalence_matrix_june2013.pdf</a> | No                                                                 |
| <b>MLT 2012</b> | 18-74 | 5    | Yes | calculated by FRA based on available country data from the 2012 FRA Violence against women: an EU-wide Survey                                           | <a href="https://unstats.un.org/sdgs/indicators/database/">https://unstats.un.org/sdgs/indicators/database/</a>                                                                   | No                                                                 |
| <b>MLT 2018</b> | 15-49 | 4    | No  | WHO VAW 2018                                                                                                                                            | <a href="https://www.who.int/publications/i/item/9789240022256">https://www.who.int/publications/i/item/9789240022256</a>                                                         | No                                                                 |
| <b>MMR 2016</b> | 15-49 | 11   | Yes | DHS                                                                                                                                                     | <a href="https://unstats.un.org/sdgs/indicators/database/">https://unstats.un.org/sdgs/indicators/database/</a>                                                                   | No                                                                 |
| <b>MMR 2018</b> | 15-49 | 11   | No  | WHO VAW 2018                                                                                                                                            | <a href="https://www.who.int/publications/i/item/9789240022256">https://www.who.int/publications/i/item/9789240022256</a>                                                         | No                                                                 |
| <b>MNE 2018</b> | 15-49 | 4    | No  | WHO VAW 2018                                                                                                                                            | <a href="https://www.who.int/publications/i/item/9789240022256">https://www.who.int/publications/i/item/9789240022256</a>                                                         | No                                                                 |
| <b>MNG 2017</b> | 15-64 | 14.7 | Yes | 2017 National Study on Gender-based violence in Mongolia                                                                                                | <a href="https://unstats.un.org/sdgs/indicators/database/">https://unstats.un.org/sdgs/indicators/database/</a>                                                                   | No                                                                 |
| <b>MNG 2018</b> | 15-49 | 12   | No  | WHO VAW 2018                                                                                                                                            | <a href="https://www.who.int/publications/i/item/9789240022256">https://www.who.int/publications/i/item/9789240022256</a>                                                         | No                                                                 |
| <b>MOZ 2004</b> | 16+   | 18   | No  | IVAWS                                                                                                                                                   | <a href="https://doi.org/10.1007/978-0-387-73204-6">https://doi.org/10.1007/978-0-387-73204-6</a>                                                                                 | No                                                                 |
| <b>MOZ 2011</b> | 15-49 | 27.7 | No  | DHS                                                                                                                                                     | <a href="https://dhsprogram.com/">https://dhsprogram.com/</a>                                                                                                                     | No                                                                 |



|                 |       |      |     |                                                                                                               |                                                                                                                                                                                                                                               |                                                                                                                                                                                       |                                                           |
|-----------------|-------|------|-----|---------------------------------------------------------------------------------------------------------------|-----------------------------------------------------------------------------------------------------------------------------------------------------------------------------------------------------------------------------------------------|---------------------------------------------------------------------------------------------------------------------------------------------------------------------------------------|-----------------------------------------------------------|
| <b>MOZ 2015</b> | 18-49 | 15.5 | Yes | AIS: Inquérito de Indicadores de Imunização, Malária e HIV/SIDA                                               | <a href="https://unstats.un.org/sdgs/indicat/ors/database/">https://unstats.un.org/sdgs/indicat/ors/database/</a>                                                                                                                             |                                                                                                                                                                                       | No                                                        |
| <b>MOZ 2018</b> | 15-49 | 16   | No  | WHO VAW 2018                                                                                                  | <a href="https://www.who.int/publications/i/item/9789240022256">https://www.who.int/publications/i/item/9789240022256</a>                                                                                                                     |                                                                                                                                                                                       | No                                                        |
| <b>MWI 2004</b> | 15-49 | 18.5 | No  | DHS                                                                                                           | <a href="https://dhsprogram.com/">https://dhsprogram.com/</a>                                                                                                                                                                                 |                                                                                                                                                                                       | No                                                        |
| <b>MWI 2010</b> | 15-49 | 22.1 | No  | DHS                                                                                                           | <a href="https://dhsprogram.com/">https://dhsprogram.com/</a>                                                                                                                                                                                 |                                                                                                                                                                                       | No                                                        |
| <b>MWI 2016</b> | 15-49 | 24.3 | Yes | DHS                                                                                                           | <a href="https://unstats.un.org/sdgs/indicat/ors/database/">https://unstats.un.org/sdgs/indicat/ors/database/</a>                                                                                                                             |                                                                                                                                                                                       | No                                                        |
| <b>MWI 2018</b> | 15-49 | 17   | No  | WHO VAW 2018                                                                                                  | <a href="https://www.who.int/publications/i/item/9789240022256">https://www.who.int/publications/i/item/9789240022256</a>                                                                                                                     |                                                                                                                                                                                       | No                                                        |
| <b>NAM 2003</b> | 15-49 | 19.5 | No  | WHO multi-country study (García-Moreno et al., 2006)                                                          | <a href="https://www.who.int/gender/violence/who_multicountry_study/media_corner/Prevalence_intimatepartner_WHOStudy.pdf">https://www.who.int/gender/violence/who_multicountry_study/media_corner/Prevalence_intimatepartner_WHOStudy.pdf</a> |                                                                                                                                                                                       | Yes - based on one estimate only                          |
| <b>NAM 2013</b> | 15-49 | 20.2 | Yes | DHS                                                                                                           | <a href="https://unstats.un.org/sdgs/indicat/ors/database/">https://unstats.un.org/sdgs/indicat/ors/database/</a>                                                                                                                             |                                                                                                                                                                                       | No                                                        |
| <b>NAM 2018</b> | 15-49 | 16   | No  | WHO VAW 2018                                                                                                  | <a href="https://www.who.int/publications/i/item/9789240022256">https://www.who.int/publications/i/item/9789240022256</a>                                                                                                                     |                                                                                                                                                                                       | No                                                        |
| <b>NER 2018</b> | 15-49 | 13   | No  | WHO VAW 2018                                                                                                  | <a href="https://www.who.int/publications/i/item/9789240022256">https://www.who.int/publications/i/item/9789240022256</a>                                                                                                                     |                                                                                                                                                                                       | No                                                        |
| <b>NGA 2008</b> | 15-49 | 15.2 | No  | DHS                                                                                                           | <a href="https://dhsprogram.com/">https://dhsprogram.com/</a>                                                                                                                                                                                 |                                                                                                                                                                                       | No                                                        |
| <b>NGA 2013</b> | 15-49 | 11   | Yes | DHS                                                                                                           | <a href="https://unstats.un.org/sdgs/indicat/ors/database/">https://unstats.un.org/sdgs/indicat/ors/database/</a>                                                                                                                             |                                                                                                                                                                                       | No                                                        |
| <b>NGA 2018</b> | 15-49 | 13.8 | No  | DHS                                                                                                           | <a href="https://dhsprogram.com/">https://dhsprogram.com/</a>                                                                                                                                                                                 |                                                                                                                                                                                       | No                                                        |
| <b>NIC 2007</b> | 15-49 | 9.3  | No  | RHS (via UN Women matrix)                                                                                     | <a href="https://www.endvawnow.org/uploads/browser/files/vawprevalence_matrix_june2013.pdf">https://www.endvawnow.org/uploads/browser/files/vawprevalence_matrix_june2013.pdf</a>                                                             |                                                                                                                                                                                       | No                                                        |
| <b>NIC 2012</b> | 15-49 | 7.5  | Yes | ENDESA                                                                                                        | <a href="https://unstats.un.org/sdgs/indicat/ors/database/">https://unstats.un.org/sdgs/indicat/ors/database/</a>                                                                                                                             |                                                                                                                                                                                       | No                                                        |
| <b>NIC 2018</b> | 15-49 | 6    | No  | WHO VAW 2018                                                                                                  | <a href="https://www.who.int/publications/i/item/9789240022256">https://www.who.int/publications/i/item/9789240022256</a>                                                                                                                     |                                                                                                                                                                                       | No                                                        |
| <b>NLD 2012</b> | 18-74 | 7    | Yes | calculated by FRA based on available country data from the 2012 FRA Violence against women: an EU-wide Survey | <a href="https://unstats.un.org/sdgs/indicat/ors/database/">https://unstats.un.org/sdgs/indicat/ors/database/</a>                                                                                                                             |                                                                                                                                                                                       | No                                                        |
| <b>NLD 2018</b> | 15-49 | 5    | No  | WHO VAW 2018                                                                                                  | <a href="https://www.who.int/publications/i/item/9789240022256">https://www.who.int/publications/i/item/9789240022256</a>                                                                                                                     |                                                                                                                                                                                       | No                                                        |
| <b>NOR 2008</b> | 20-55 | 5.5  | No  | Other (via UN Women matrix)                                                                                   | <a href="https://www.endvawnow.org/uploads/browser/files/vawprevalence_matrix_june2013.pdf">https://www.endvawnow.org/uploads/browser/files/vawprevalence_matrix_june2013.pdf</a>                                                             | Neroien A, Schei B. 2008. Partner violence and health: results from the first national study on violence against women in Norway. Scandanavian Journal of Public Health 36(2): 161-8. | No                                                        |
| <b>NOR 2018</b> | 15-49 | 4    | No  | WHO VAW 2018                                                                                                  | <a href="https://www.who.int/publications/i/item/9789240022256">https://www.who.int/publications/i/item/9789240022256</a>                                                                                                                     |                                                                                                                                                                                       | No                                                        |
| <b>NPL 2011</b> | 15-49 | 14.3 | No  | DHS                                                                                                           | <a href="https://dhsprogram.com/">https://dhsprogram.com/</a>                                                                                                                                                                                 |                                                                                                                                                                                       | No                                                        |
| <b>NPL 2016</b> | 15-49 | 11.2 | Yes | DHS                                                                                                           | <a href="https://unstats.un.org/sdgs/indicat/ors/database/">https://unstats.un.org/sdgs/indicat/ors/database/</a>                                                                                                                             |                                                                                                                                                                                       | No                                                        |
| <b>NPL 2018</b> | 15-49 | 11   | No  | WHO VAW 2018                                                                                                  | <a href="https://www.who.int/publications/i/item/9789240022256">https://www.who.int/publications/i/item/9789240022256</a>                                                                                                                     |                                                                                                                                                                                       | No                                                        |
| <b>NRU 2013</b> | 15-64 | 22   | No  | Other (via UN Women Global Database on Violence against Women)                                                | <a href="https://evaw-global-database.unwomen.org/en">https://evaw-global-database.unwomen.org/en</a>                                                                                                                                         | Carlued Leon and Tara Detogia, 2014. Nauru Family Health and Support Study - An Exploratory Study on Violence against Women.                                                          | No                                                        |
| <b>NRU 2018</b> | 15-49 | 20   | No  | WHO VAW 2018                                                                                                  | <a href="https://www.who.int/publications/i/item/9789240022256">https://www.who.int/publications/i/item/9789240022256</a>                                                                                                                     |                                                                                                                                                                                       | No                                                        |
| <b>NZL 2002</b> | 18-64 | 5.55 | No  | WHO multi-country study (UN matrix)                                                                           | <a href="https://www.who.int/gender/violence/who_multicountry_study/media_corner/Prevalence_intimatepartner_WHOStudy.pdf">https://www.who.int/gender/violence/who_multicountry_study/media_corner/Prevalence_intimatepartner_WHOStudy.pdf</a> |                                                                                                                                                                                       | Yes - based on averaged estimates for 2 or more locations |
| <b>NZL 2018</b> | 15-49 | 4    | No  | WHO VAW 2018                                                                                                  | <a href="https://www.who.int/publications/">https://www.who.int/publications/</a>                                                                                                                                                             |                                                                                                                                                                                       | No                                                        |

|                 |       |      |     |                                                                                                                                                                                                                                            |                                                                                                                                                                                                                                                                                                                                     |                                                                       |
|-----------------|-------|------|-----|--------------------------------------------------------------------------------------------------------------------------------------------------------------------------------------------------------------------------------------------|-------------------------------------------------------------------------------------------------------------------------------------------------------------------------------------------------------------------------------------------------------------------------------------------------------------------------------------|-----------------------------------------------------------------------|
| <b>PAK 2018</b> | 15-49 | 14.5 | No  | DHS                                                                                                                                                                                                                                        | <a href="https://dhsprogram.com/">i/item/9789240022256</a>                                                                                                                                                                                                                                                                          | No                                                                    |
| <b>PAN 2009</b> | 15-49 | 10.1 | Yes | PAHO 2018<br>publication Intimate<br>Partner Violence<br>against Women in the<br>Americas: calculated by<br>PAHO based on<br>available country data<br>from the 2009 Encuesta<br>Nacional de Salud<br>Sexual y Reproductiva<br>Panama 2009 | <a href="https://unstats.un.org/sdgs/indicat&lt;br/&gt;ors/database/">https://unstats.un.org/sdgs/indicat<br/>ors/database/</a>                                                                                                                                                                                                     | No                                                                    |
| <b>PAN 2018</b> | 15-49 | 8    | No  | WHO VAW 2018                                                                                                                                                                                                                               | <a href="https://www.who.int/publications/&lt;br/&gt;i/item/9789240022256">https://www.who.int/publications/<br/>i/item/9789240022256</a>                                                                                                                                                                                           | No                                                                    |
| <b>PER 2003</b> | 15-49 | 26.7 | No  | WHO multi-country<br>study (Garcia-Moreno<br>et al., 2006)                                                                                                                                                                                 | <a href="https://www.who.int/gender/viole&lt;br/&gt;nce/who_multicountry_study/me&lt;br/&gt;dia_corner/Prevalence_intimatepa&lt;br/&gt;rtner_WHOStudy.pdf">https://www.who.int/gender/viole<br/>nce/who_multicountry_study/me<br/>dia_corner/Prevalence_intimatepa<br/>rtner_WHOStudy.pdf</a>                                       | Yes - based<br>on averaged<br>estimates for<br>2 or more<br>locations |
| <b>PER 2008</b> | 15-49 | 14.9 | No  | DHS                                                                                                                                                                                                                                        | <a href="https://dhsprogram.com/">https://dhsprogram.com/</a>                                                                                                                                                                                                                                                                       | No                                                                    |
| <b>PER 2009</b> | 15-49 | 14.2 | No  | DHS                                                                                                                                                                                                                                        | <a href="https://dhsprogram.com/">https://dhsprogram.com/</a>                                                                                                                                                                                                                                                                       | No                                                                    |
| <b>PER 2010</b> | 15-49 | 13.9 | No  | DHS                                                                                                                                                                                                                                        | <a href="https://dhsprogram.com/">https://dhsprogram.com/</a>                                                                                                                                                                                                                                                                       | No                                                                    |
| <b>PER 2011</b> | 15-49 | 13.6 | No  | DHS                                                                                                                                                                                                                                        | <a href="https://dhsprogram.com/">https://dhsprogram.com/</a>                                                                                                                                                                                                                                                                       | No                                                                    |
| <b>PER 2012</b> | 15-49 | 12.9 | No  | DHS                                                                                                                                                                                                                                        | <a href="https://dhsprogram.com/">https://dhsprogram.com/</a>                                                                                                                                                                                                                                                                       | No                                                                    |
| <b>PER 2013</b> | 15-49 | 12.1 | No  | DHS                                                                                                                                                                                                                                        | <a href="https://dhsprogram.com/">https://dhsprogram.com/</a>                                                                                                                                                                                                                                                                       | No                                                                    |
| <b>PER 2014</b> | 15-49 | 12.8 | No  | DHS                                                                                                                                                                                                                                        | <a href="https://dhsprogram.com/">https://dhsprogram.com/</a>                                                                                                                                                                                                                                                                       | No                                                                    |
| <b>PER 2015</b> | 15-49 | 11.7 | No  | Encuesta demografica y<br>de salud familiar<br>ENDES                                                                                                                                                                                       | <a href="https://proyectos.inei.gob.pe/ende&lt;br/&gt;s/">https://proyectos.inei.gob.pe/ende<br/>s/</a>                                                                                                                                                                                                                             |                                                                       |
| <b>PER 2016</b> | 15-49 | 10.8 | Yes | Encuesta demografica y<br>de salud familiar<br>ENDES                                                                                                                                                                                       | <a href="https://unstats.un.org/sdgs/indicat&lt;br/&gt;ors/database/">https://unstats.un.org/sdgs/indicat<br/>ors/database/</a>                                                                                                                                                                                                     | No                                                                    |
| <b>PER 2017</b> | 15-49 | 10.6 | No  | Encuesta demografica y<br>de salud familiar<br>ENDES                                                                                                                                                                                       | <a href="https://proyectos.inei.gob.pe/ende&lt;br/&gt;s/">https://proyectos.inei.gob.pe/ende<br/>s/</a>                                                                                                                                                                                                                             |                                                                       |
| <b>PER 2018</b> | 15-49 | 10.9 | No  | Encuesta demografica y<br>de salud familiar<br>ENDES                                                                                                                                                                                       | <a href="https://proyectos.inei.gob.pe/ende&lt;br/&gt;s/">https://proyectos.inei.gob.pe/ende<br/>s/</a>                                                                                                                                                                                                                             |                                                                       |
| <b>PER 2019</b> | 15-49 | 10   | No  | Encuesta demografica y<br>de salud familiar<br>ENDES                                                                                                                                                                                       | <a href="https://proyectos.inei.gob.pe/ende&lt;br/&gt;s/">https://proyectos.inei.gob.pe/ende<br/>s/</a>                                                                                                                                                                                                                             |                                                                       |
| <b>PHL 2005</b> | 16+   | 3    | No  | IVAWS                                                                                                                                                                                                                                      | <a href="https://doi.org/10.1007/978-0-&lt;br/&gt;387-73204-6">https://doi.org/10.1007/978-0-<br/>387-73204-6</a>                                                                                                                                                                                                                   | No                                                                    |
| <b>PHL 2008</b> | 15-49 | 10.3 | No  | DHS                                                                                                                                                                                                                                        | <a href="https://dhsprogram.com/">https://dhsprogram.com/</a>                                                                                                                                                                                                                                                                       | No                                                                    |
| <b>PHL 2013</b> | 15-49 | 7.1  | No  | DHS                                                                                                                                                                                                                                        | <a href="https://dhsprogram.com/">https://dhsprogram.com/</a>                                                                                                                                                                                                                                                                       | No                                                                    |
| <b>PHL 2017</b> | 15-49 | 5.5  | Yes | DHS                                                                                                                                                                                                                                        | <a href="https://unstats.un.org/sdgs/indicat&lt;br/&gt;ors/database/">https://unstats.un.org/sdgs/indicat<br/>ors/database/</a>                                                                                                                                                                                                     | No                                                                    |
| <b>PHL 2018</b> | 15-49 | 6    | No  | WHO VAW 2018                                                                                                                                                                                                                               | <a href="https://www.who.int/publications/&lt;br/&gt;i/item/9789240022256">https://www.who.int/publications/<br/>i/item/9789240022256</a>                                                                                                                                                                                           | No                                                                    |
| <b>PLW 2013</b> | 15-64 | 9.6  | Yes | Belau Family Health<br>and Safety Study                                                                                                                                                                                                    | <a href="https://unstats.un.org/sdgs/indicat&lt;br/&gt;ors/database/">https://unstats.un.org/sdgs/indicat<br/>ors/database/</a>                                                                                                                                                                                                     | No                                                                    |
| <b>PLW 2018</b> | 15-49 | 14   | No  | WHO VAW 2018                                                                                                                                                                                                                               | <a href="https://www.who.int/publications/&lt;br/&gt;i/item/9789240022256">https://www.who.int/publications/<br/>i/item/9789240022256</a>                                                                                                                                                                                           | No                                                                    |
| <b>PNG 2013</b> | 18-49 | 13.4 | No  | UNMCS                                                                                                                                                                                                                                      | <a href="https://svri.org/sites/default/files/a&lt;br/&gt;ttachments/2018-05-&lt;br/&gt;09/Why%20do%20some%20men&lt;br/&gt;%20use%20violence%20against&lt;br/&gt;%20women_1.pdf">https://svri.org/sites/default/files/a<br/>ttachments/2018-05-<br/>09/Why%20do%20some%20men<br/>%20use%20violence%20against<br/>%20women_1.pdf</a> | Yes - based<br>on one<br>estimate only                                |
| <b>PNG 2018</b> | 15-49 | 47.6 | No  | DHS                                                                                                                                                                                                                                        | <a href="https://dhsprogram.com/">https://dhsprogram.com/</a>                                                                                                                                                                                                                                                                       | No                                                                    |
| <b>POL 2004</b> | 16+   | 3    | No  | IVAWS                                                                                                                                                                                                                                      | <a href="https://doi.org/10.1007/978-0-&lt;br/&gt;387-73204-6">https://doi.org/10.1007/978-0-<br/>387-73204-6</a>                                                                                                                                                                                                                   | No                                                                    |
| <b>POL 2012</b> | 18-74 | 3    | Yes | calculated by FRA<br>based on available<br>country data from the<br>2012 FRA Violence<br>against women: an EU-<br>wide Survey                                                                                                              | <a href="https://unstats.un.org/sdgs/indicat&lt;br/&gt;ors/database/">https://unstats.un.org/sdgs/indicat<br/>ors/database/</a>                                                                                                                                                                                                     | No                                                                    |
| <b>POL 2018</b> | 15-49 | 3    | No  | WHO VAW 2018                                                                                                                                                                                                                               | <a href="https://www.who.int/publications/&lt;br/&gt;i/item/9789240022256">https://www.who.int/publications/<br/>i/item/9789240022256</a>                                                                                                                                                                                           | No                                                                    |
| <b>PRT 2012</b> | 18-74 | 6    | Yes | calculated by FRA<br>based on available<br>country data from the<br>2012 FRA Violence<br>against women: an EU-                                                                                                                             | <a href="https://unstats.un.org/sdgs/indicat&lt;br/&gt;ors/database/">https://unstats.un.org/sdgs/indicat<br/>ors/database/</a>                                                                                                                                                                                                     | No                                                                    |

|                 |       |      |     |                                                                                                                                                                                                                  |                                                                                                                                                                                                           |                                                                                                                                      |
|-----------------|-------|------|-----|------------------------------------------------------------------------------------------------------------------------------------------------------------------------------------------------------------------|-----------------------------------------------------------------------------------------------------------------------------------------------------------------------------------------------------------|--------------------------------------------------------------------------------------------------------------------------------------|
| <b>PRT 2018</b> | 15-49 | 4    | No  | wide Survey<br>WHO VAW 2018                                                                                                                                                                                      | <a href="https://www.who.int/publications/i/item/9789240022256">https://www.who.int/publications/i/item/9789240022256</a>                                                                                 | No                                                                                                                                   |
| <b>PRY 2008</b> | 15-44 | 8    | No  | RHS data reported in PAHO 2012 publication VAW in LAC: Comparative analysis of population-based data from 12 countries                                                                                           | <a href="https://iris.paho.org/handle/10665.2/3471">https://iris.paho.org/handle/10665.2/3471</a>                                                                                                         | No                                                                                                                                   |
| <b>PRY 2018</b> | 15-49 | 6    | No  | WHO VAW 2018                                                                                                                                                                                                     | <a href="https://www.who.int/publications/i/item/9789240022256">https://www.who.int/publications/i/item/9789240022256</a>                                                                                 | No                                                                                                                                   |
| <b>PSE 2018</b> | 15-49 | 19   | No  | WHO VAW 2018                                                                                                                                                                                                     | <a href="https://www.who.int/publications/i/item/9789240022256">https://www.who.int/publications/i/item/9789240022256</a>                                                                                 | No                                                                                                                                   |
| <b>ROU 2012</b> | 18-74 | 7    | Yes | calculated by FRA based on available country data from the 2012 FRA Violence against women: an EU-wide Survey                                                                                                    | <a href="https://unstats.un.org/sdgs/indicators/database/">https://unstats.un.org/sdgs/indicators/database/</a>                                                                                           | No                                                                                                                                   |
| <b>ROU 2018</b> | 15-49 | 7    | No  | WHO VAW 2018                                                                                                                                                                                                     | <a href="https://www.who.int/publications/i/item/9789240022256">https://www.who.int/publications/i/item/9789240022256</a>                                                                                 | No                                                                                                                                   |
| <b>RWA 2005</b> | 15-49 | 25.6 | No  | DHS                                                                                                                                                                                                              | <a href="https://dhsprogram.com/">https://dhsprogram.com/</a>                                                                                                                                             | No                                                                                                                                   |
| <b>RWA 2010</b> | 15-49 | 44.3 | No  | DHS                                                                                                                                                                                                              | <a href="https://dhsprogram.com/">https://dhsprogram.com/</a>                                                                                                                                             | No                                                                                                                                   |
| <b>RWA 2015</b> | 15-49 | 20.7 | Yes | DHS                                                                                                                                                                                                              | <a href="https://unstats.un.org/sdgs/indicators/database/">https://unstats.un.org/sdgs/indicators/database/</a>                                                                                           | No                                                                                                                                   |
| <b>RWA 2018</b> | 15-49 | 23   | No  | WHO VAW 2018                                                                                                                                                                                                     | <a href="https://www.who.int/publications/i/item/9789240022256">https://www.who.int/publications/i/item/9789240022256</a>                                                                                 | No                                                                                                                                   |
| <b>SDN 2018</b> | 15-49 | 17   | No  | WHO VAW 2018                                                                                                                                                                                                     | <a href="https://www.who.int/publications/i/item/9789240022256">https://www.who.int/publications/i/item/9789240022256</a>                                                                                 | No                                                                                                                                   |
| <b>SEN 2017</b> | 15-49 | 12.2 | Yes | DHS                                                                                                                                                                                                              | <a href="https://unstats.un.org/sdgs/indicators/database/">https://unstats.un.org/sdgs/indicators/database/</a>                                                                                           | No                                                                                                                                   |
| <b>SEN 2018</b> | 15-49 | 12   | No  | WHO VAW 2018                                                                                                                                                                                                     | <a href="https://www.who.int/publications/i/item/9789240022256">https://www.who.int/publications/i/item/9789240022256</a>                                                                                 | No                                                                                                                                   |
| <b>SGP 2009</b> | 18-69 | 1    | No  | Other (via UN Women Global Database on Violence against Women)                                                                                                                                                   | <a href="https://evaw-global-database.unwomen.org/en">https://evaw-global-database.unwomen.org/en</a>                                                                                                     | Bouhours, B., Cheong, C.W., Bong, B. and Anderson, S., 2013. International Violence Against Women Survey: Final Report on Singapore. |
| <b>SGP 2018</b> | 15-49 | 2    | No  | WHO VAW 2018                                                                                                                                                                                                     | <a href="https://www.who.int/publications/i/item/9789240022256">https://www.who.int/publications/i/item/9789240022256</a>                                                                                 | No                                                                                                                                   |
| <b>SLB 2008</b> | 15-49 | 41.8 | Yes | Solomon Islands Family Health and Safety Study: A study on violence against women and children                                                                                                                   | <a href="https://unstats.un.org/sdgs/indicators/database/">https://unstats.un.org/sdgs/indicators/database/</a>                                                                                           | No                                                                                                                                   |
| <b>SLB 2018</b> | 15-49 | 28   | No  | WHO VAW 2018                                                                                                                                                                                                     | <a href="https://www.who.int/publications/i/item/9789240022256">https://www.who.int/publications/i/item/9789240022256</a>                                                                                 | No                                                                                                                                   |
| <b>SLE 2013</b> | 15-49 | 28.7 | Yes | DHS                                                                                                                                                                                                              | <a href="https://unstats.un.org/sdgs/indicators/database/">https://unstats.un.org/sdgs/indicators/database/</a>                                                                                           | No                                                                                                                                   |
| <b>SLE 2018</b> | 15-49 | 20   | No  | WHO VAW 2018                                                                                                                                                                                                     | <a href="https://www.who.int/publications/i/item/9789240022256">https://www.who.int/publications/i/item/9789240022256</a>                                                                                 | No                                                                                                                                   |
| <b>SLV 2008</b> | 15-49 | 7.7  | No  | RHS (via UN Women matrix)                                                                                                                                                                                        | <a href="https://www.endvawnow.org/uploads/browser/files/vawprevalence_matrix_june2013.pdf">https://www.endvawnow.org/uploads/browser/files/vawprevalence_matrix_june2013.pdf</a>                         | No                                                                                                                                   |
| <b>SLV 2014</b> | 15-64 | 6.7  | Yes | PAHO 2018 publication Intimate Partner Violence against Women in the Americas: calculated by PAHO based on available country data from the Violencia Contra las Mujeres en El Salvador: Estudio poblacional 2014 | <a href="https://unstats.un.org/sdgs/indicators/database/">https://unstats.un.org/sdgs/indicators/database/</a>                                                                                           | No                                                                                                                                   |
| <b>SLV 2018</b> | 15-49 | 6    | No  | WHO VAW 2018                                                                                                                                                                                                     | <a href="https://www.who.int/publications/i/item/9789240022256">https://www.who.int/publications/i/item/9789240022256</a>                                                                                 | No                                                                                                                                   |
| <b>SRB 2003</b> | 15-49 | 3.7  | No  | WHO multi-country study (Garcia-Moreno et al., 2006)                                                                                                                                                             | <a href="https://www.who.int/gender/violence/who_multicountry_study/media_corner/Prevalence_intimatepa">https://www.who.int/gender/violence/who_multicountry_study/media_corner/Prevalence_intimatepa</a> | Yes - based on one estimate only                                                                                                     |

|                 |       |      |     |                                                                                                               |                                                                                                                                                                                                                                                 |                                                                                                                                                                                     |                                                           |
|-----------------|-------|------|-----|---------------------------------------------------------------------------------------------------------------|-------------------------------------------------------------------------------------------------------------------------------------------------------------------------------------------------------------------------------------------------|-------------------------------------------------------------------------------------------------------------------------------------------------------------------------------------|-----------------------------------------------------------|
| <b>SRB 2018</b> | 18-74 | 3.4  | No  | Other (via UN Women Global Database on Violence against Women)                                                | <a href="https://evaw-global-database.unwomen.org/en">rtner_WHOSStudy.pdf<br/>https://evaw-global-database.unwomen.org/en</a>                                                                                                                   | Organization for Security and Cooperation in Europe (OSCE). 2019. OESCE-led Survey on Violence against Women: Main Report. Vienna, Austria: OSCE Secretariat.                       | No                                                        |
| <b>SSD 2018</b> | 15-49 | 27   | No  | WHO VAW 2018                                                                                                  | <a href="https://www.who.int/publications/i/item/9789240022256">https://www.who.int/publications/i/item/9789240022256</a>                                                                                                                       |                                                                                                                                                                                     | No                                                        |
| <b>STP 2009</b> | 15-49 | 27.9 | No  | DHS (changed UN SDG value of 26.3 to 27.9 to match DHS report and UN matrix)                                  | <a href="https://dhsprogram.com/">https://dhsprogram.com/</a>                                                                                                                                                                                   |                                                                                                                                                                                     | No                                                        |
| <b>STP 2018</b> | 15-49 | 18   | No  | WHO VAW 2018                                                                                                  | <a href="https://www.who.int/publications/i/item/9789240022256">https://www.who.int/publications/i/item/9789240022256</a>                                                                                                                       |                                                                                                                                                                                     | No                                                        |
| <b>SUR 2018</b> | 15-49 | 8    | No  | WHO VAW 2018                                                                                                  | <a href="https://www.who.int/publications/i/item/9789240022256">https://www.who.int/publications/i/item/9789240022256</a>                                                                                                                       |                                                                                                                                                                                     | No                                                        |
| <b>SVK 2008</b> | ?     | 12.2 | No  | Other* (via UN Women matrix; can't verify as can't find report))                                              | <a href="https://www.endvawnow.org/uploads/browser/files/vawprevalence_matrix_june2013.pdf">https://www.endvawnow.org/uploads/browser/files/vawprevalence_matrix_june2013.pdf</a>                                                               | Bondarova et al., 2008 "Representative Research on Prevalence and experience of Women with Violence against Women in Slovakia". Institute for Labor and Family Research, Bratislava | No                                                        |
| <b>SVK 2012</b> | 18-74 | 8    | Yes | calculated by FRA based on available country data from the 2012 FRA Violence against women: an EU-wide Survey | <a href="https://unstats.un.org/sdgs/indicators/database/">https://unstats.un.org/sdgs/indicators/database/</a>                                                                                                                                 |                                                                                                                                                                                     | No                                                        |
| <b>SVK 2018</b> | 15-49 | 6    | No  | WHO VAW 2018                                                                                                  | <a href="https://www.who.int/publications/i/item/9789240022256">https://www.who.int/publications/i/item/9789240022256</a>                                                                                                                       |                                                                                                                                                                                     | No                                                        |
| <b>SVN 2012</b> | 18-74 | 2    | Yes | calculated by FRA based on available country data from the 2012 FRA Violence against women: an EU-wide Survey | <a href="https://unstats.un.org/sdgs/indicators/database/">https://unstats.un.org/sdgs/indicators/database/</a>                                                                                                                                 |                                                                                                                                                                                     | No                                                        |
| <b>SVN 2018</b> | 15-49 | 3    | No  | WHO VAW 2018                                                                                                  | <a href="https://www.who.int/publications/i/item/9789240022256">https://www.who.int/publications/i/item/9789240022256</a>                                                                                                                       |                                                                                                                                                                                     | No                                                        |
| <b>SWE 2012</b> | 18-74 | 6    | Yes | calculated by FRA based on available country data from the 2012 FRA Violence against women: an EU-wide Survey | <a href="https://unstats.un.org/sdgs/indicators/database/">https://unstats.un.org/sdgs/indicators/database/</a>                                                                                                                                 |                                                                                                                                                                                     | No                                                        |
| <b>SWE 2018</b> | 15-49 | 6    | No  | WHO VAW 2018                                                                                                  | <a href="https://www.who.int/publications/i/item/9789240022256">https://www.who.int/publications/i/item/9789240022256</a>                                                                                                                       |                                                                                                                                                                                     | No                                                        |
| <b>SWZ 2018</b> | 15-49 | 18   | No  | WHO VAW 2018                                                                                                  | <a href="https://www.who.int/publications/i/item/9789240022256">https://www.who.int/publications/i/item/9789240022256</a>                                                                                                                       |                                                                                                                                                                                     | No                                                        |
| <b>TCD 2015</b> | 15-49 | 17.5 | Yes | DHS                                                                                                           | <a href="https://unstats.un.org/sdgs/indicators/database/">https://unstats.un.org/sdgs/indicators/database/</a>                                                                                                                                 |                                                                                                                                                                                     | No                                                        |
| <b>TCD 2018</b> | 15-49 | 16   | No  | WHO VAW 2018                                                                                                  | <a href="https://www.who.int/publications/i/item/9789240022256">https://www.who.int/publications/i/item/9789240022256</a>                                                                                                                       |                                                                                                                                                                                     | No                                                        |
| <b>TGO 2014</b> | 15-49 | 12.7 | Yes | DHS                                                                                                           | <a href="https://unstats.un.org/sdgs/indicators/database/">https://unstats.un.org/sdgs/indicators/database/</a>                                                                                                                                 |                                                                                                                                                                                     | No                                                        |
| <b>TGO 2018</b> | 15-49 | 13   | No  | WHO VAW 2018                                                                                                  | <a href="https://www.who.int/publications/i/item/9789240022256">https://www.who.int/publications/i/item/9789240022256</a>                                                                                                                       |                                                                                                                                                                                     | No                                                        |
| <b>THA 2003</b> | 15-49 | 22.1 | No  | WHO multi-country study (Garcia-Moreno et al., 2006)                                                          | <a href="https://www.who.int/gender/violence/who_multicountry_study/media_corner/Prevalence_intimatepartner_WHOSStudy.pdf">https://www.who.int/gender/violence/who_multicountry_study/media_corner/Prevalence_intimatepartner_WHOSStudy.pdf</a> |                                                                                                                                                                                     | Yes - based on averaged estimates for 2 or more locations |
| <b>THA 2018</b> | 15-49 | 9    | No  | WHO VAW 2018                                                                                                  | <a href="https://www.who.int/publications/i/item/9789240022256">https://www.who.int/publications/i/item/9789240022256</a>                                                                                                                       |                                                                                                                                                                                     | No                                                        |

|                 |       |      |     |                                                                                                                                                                                                                |                                                                                                                                                                                                                                               |                                                           |
|-----------------|-------|------|-----|----------------------------------------------------------------------------------------------------------------------------------------------------------------------------------------------------------------|-----------------------------------------------------------------------------------------------------------------------------------------------------------------------------------------------------------------------------------------------|-----------------------------------------------------------|
| <b>TJK 2012</b> | 15-49 | 15.2 | No  | DHS                                                                                                                                                                                                            | <a href="https://dhsprogram.com/">https://dhsprogram.com/</a>                                                                                                                                                                                 | No                                                        |
| <b>TJK 2017</b> | 15-49 | 19   | Yes | DHS                                                                                                                                                                                                            | <a href="https://unstats.un.org/sdgs/indicators/database/">https://unstats.un.org/sdgs/indicators/database/</a>                                                                                                                               | No                                                        |
| <b>TJK 2018</b> | 15-49 | 14   | No  | WHO VAW 2018                                                                                                                                                                                                   | <a href="https://www.who.int/publications/i/item/9789240022256">https://www.who.int/publications/i/item/9789240022256</a>                                                                                                                     | No                                                        |
| <b>TLS 2010</b> | 15-49 | 31.5 | No  | DHS                                                                                                                                                                                                            | <a href="https://dhsprogram.com/">https://dhsprogram.com/</a>                                                                                                                                                                                 | No                                                        |
| <b>TLS 2016</b> | 15-49 | 34.6 | Yes | DHS                                                                                                                                                                                                            | <a href="https://unstats.un.org/sdgs/indicators/database/">https://unstats.un.org/sdgs/indicators/database/</a>                                                                                                                               | No                                                        |
| <b>TLS 2018</b> | 15-49 | 28   | No  | WHO VAW 2018                                                                                                                                                                                                   | <a href="https://www.who.int/publications/i/item/9789240022256">https://www.who.int/publications/i/item/9789240022256</a>                                                                                                                     | No                                                        |
| <b>TON 2009</b> | 15-49 | 18.9 | Yes | National Study on Domestic Violence against Women in Tonga                                                                                                                                                     | <a href="https://unstats.un.org/sdgs/indicators/database/">https://unstats.un.org/sdgs/indicators/database/</a>                                                                                                                               | No                                                        |
| <b>TON 2018</b> | 15-49 | 17   | No  | WHO VAW 2018                                                                                                                                                                                                   | <a href="https://www.who.int/publications/i/item/9789240022256">https://www.who.int/publications/i/item/9789240022256</a>                                                                                                                     | No                                                        |
| <b>TTO 2017</b> | 15-64 | 5.7  | Yes | National Women's and Health Survey for Trinidad and Tobago. NB: corrected this from UN Women calculation provided in SDG figures to match that in report                                                       | <a href="https://unstats.un.org/sdgs/indicators/database/">https://unstats.un.org/sdgs/indicators/database/</a>                                                                                                                               | No                                                        |
| <b>TTO 2018</b> | 15-49 | 8    | No  | WHO VAW 2018                                                                                                                                                                                                   | <a href="https://www.who.int/publications/i/item/9789240022256">https://www.who.int/publications/i/item/9789240022256</a>                                                                                                                     | No                                                        |
| <b>TUN 2018</b> | 15-49 | 10   | No  | WHO VAW 2018                                                                                                                                                                                                   | <a href="https://www.who.int/publications/i/item/9789240022256">https://www.who.int/publications/i/item/9789240022256</a>                                                                                                                     | No                                                        |
| <b>TUR 2008</b> | 15-59 | 13.7 | No  | WHO (UN Women matrix) / National Research on Domestic Violence against Women in Turkey                                                                                                                         | <a href="https://www.endvawnow.org/uploads/browser/files/vawprevalence_matrix_june2013.pdf">https://www.endvawnow.org/uploads/browser/files/vawprevalence_matrix_june2013.pdf</a>                                                             | No                                                        |
| <b>TUR 2014</b> | 15-59 | 11   | Yes | Domestic Violence against Women in Turkey                                                                                                                                                                      | <a href="https://unstats.un.org/sdgs/indicators/database/">https://unstats.un.org/sdgs/indicators/database/</a>                                                                                                                               | No                                                        |
| <b>TUR 2018</b> | 15-49 | 12   | No  | WHO VAW 2018                                                                                                                                                                                                   | <a href="https://www.who.int/publications/i/item/9789240022256">https://www.who.int/publications/i/item/9789240022256</a>                                                                                                                     | No                                                        |
| <b>TUV 2007</b> | 15-49 | 25   | Yes | DHS                                                                                                                                                                                                            | <a href="https://unstats.un.org/sdgs/indicators/database/">https://unstats.un.org/sdgs/indicators/database/</a>                                                                                                                               | No                                                        |
| <b>TUV 2018</b> | 15-49 | 20   | No  | WHO VAW 2018                                                                                                                                                                                                   | <a href="https://www.who.int/publications/i/item/9789240022256">https://www.who.int/publications/i/item/9789240022256</a>                                                                                                                     | No                                                        |
| <b>TZA 2003</b> | 15-49 | 25.3 | No  | WHO multi-country study (Garcia-Moreno et al., 2006)                                                                                                                                                           | <a href="https://www.who.int/gender/violence/who_multicountry_study/media_corner/Prevalence_intimatepartner_WHOStudy.pdf">https://www.who.int/gender/violence/who_multicountry_study/media_corner/Prevalence_intimatepartner_WHOStudy.pdf</a> | Yes - based on averaged estimates for 2 or more locations |
| <b>TZA 2010</b> | 15-49 | 36.8 | No  | DHS                                                                                                                                                                                                            | <a href="https://dhsprogram.com/">https://dhsprogram.com/</a>                                                                                                                                                                                 | No                                                        |
| <b>TZA 2016</b> | 15-49 | 29.6 | Yes | DHS                                                                                                                                                                                                            | <a href="https://unstats.un.org/sdgs/indicators/database/">https://unstats.un.org/sdgs/indicators/database/</a>                                                                                                                               | No                                                        |
| <b>TZA 2018</b> | 15-49 | 24   | No  | WHO VAW 2018                                                                                                                                                                                                   | <a href="https://www.who.int/publications/i/item/9789240022256">https://www.who.int/publications/i/item/9789240022256</a>                                                                                                                     | No                                                        |
| <b>UGA 2006</b> | 15-49 | 45   | No  | DHS                                                                                                                                                                                                            | <a href="https://dhsprogram.com/">https://dhsprogram.com/</a>                                                                                                                                                                                 | No                                                        |
| <b>UGA 2011</b> | 15-49 | 34.6 | No  | DHS                                                                                                                                                                                                            | <a href="https://dhsprogram.com/">https://dhsprogram.com/</a>                                                                                                                                                                                 | No                                                        |
| <b>UGA 2016</b> | 15-49 | 29.9 | Yes | DHS                                                                                                                                                                                                            | <a href="https://unstats.un.org/sdgs/indicators/database/">https://unstats.un.org/sdgs/indicators/database/</a>                                                                                                                               | No                                                        |
| <b>UGA 2018</b> | 15-49 | 26   | No  | WHO VAW 2018                                                                                                                                                                                                   | <a href="https://www.who.int/publications/i/item/9789240022256">https://www.who.int/publications/i/item/9789240022256</a>                                                                                                                     | No                                                        |
| <b>UKR 2007</b> | 15-49 | 10.6 | No  | DHS (corrected from 10.2 to 10.6 after checking DHS report)                                                                                                                                                    | <a href="https://dhsprogram.com/">https://dhsprogram.com/</a>                                                                                                                                                                                 | No                                                        |
| <b>UKR 2018</b> | 15-49 | 9    | No  | WHO VAW 2018                                                                                                                                                                                                   | <a href="https://www.who.int/publications/i/item/9789240022256">https://www.who.int/publications/i/item/9789240022256</a>                                                                                                                     | No                                                        |
| <b>URY 2013</b> | 15+   | 2.8  | Yes | PAHO 2018 publication Intimate Partner Violence against Women in the Americas: calculated by PAHO based on available country data from the 2013 Encuesta Nacional de Violencia basada en Genero y Generaciones | <a href="https://unstats.un.org/sdgs/indicators/database/">https://unstats.un.org/sdgs/indicators/database/</a>                                                                                                                               | No                                                        |
| <b>URY 2018</b> | 15-49 | 4    | No  | WHO VAW 2018                                                                                                                                                                                                   | <a href="https://www.who.int/publications/">https://www.who.int/publications/</a>                                                                                                                                                             | No                                                        |

|                 |       |      |     |                                                              |                                                                                                                                                                                                                                               |    |
|-----------------|-------|------|-----|--------------------------------------------------------------|-----------------------------------------------------------------------------------------------------------------------------------------------------------------------------------------------------------------------------------------------|----|
| <b>USA 2000</b> | 18+   | 1.5  | No  | RHS (via UN Women matrix)                                    | <a href="https://www.endvavnow.org/uploads/browser/files/vawprevalence_matrix_june2013.pdf">i/item/9789240022256<br/>https://www.endvavnow.org/uploads/browser/files/vawprevalence_matrix_june2013.pdf</a>                                    | No |
| <b>USA 2018</b> | 15-49 | 6    | No  | WHO VAW 2018                                                 | <a href="https://www.who.int/publications/i/item/9789240022256">https://www.who.int/publications/i/item/9789240022256</a>                                                                                                                     | No |
| <b>VEN 2018</b> | 15-49 | 8    | No  | WHO VAW 2018                                                 | <a href="https://www.who.int/publications/i/item/9789240022256">https://www.who.int/publications/i/item/9789240022256</a>                                                                                                                     | No |
| <b>VNM 2010</b> | 18-60 | 10.8 | Yes | NATIONAL STUDY ON DOMESTIC VIOLENCE AGAINST WOMEN IN VIETNAM | <a href="https://unstats.un.org/sdgs/indicators/database/">https://unstats.un.org/sdgs/indicators/database/</a>                                                                                                                               | No |
| <b>VNM 2018</b> | 15-49 | 10   | No  | WHO VAW 2018                                                 | <a href="https://www.who.int/publications/i/item/9789240022256">https://www.who.int/publications/i/item/9789240022256</a>                                                                                                                     | No |
| <b>VUT 2009</b> | 15-49 | 44   | Yes | National Survey on Women's Lives and Family Relationships    | <a href="https://unstats.un.org/sdgs/indicators/database/">https://unstats.un.org/sdgs/indicators/database/</a>                                                                                                                               | No |
| <b>VUT 2018</b> | 15-49 | 29   | No  | WHO VAW 2018                                                 | <a href="https://www.who.int/publications/i/item/9789240022256">https://www.who.int/publications/i/item/9789240022256</a>                                                                                                                     | No |
| <b>WSM 2003</b> | 15-49 | 22.4 | No  | WHO multi-country study (Garcia-Moreno et al., 2006)         | <a href="https://www.who.int/gender/violence/who_multicountry_study/media_corner/Prevalence_intimatepartner_WHOStudy.pdf">https://www.who.int/gender/violence/who_multicountry_study/media_corner/Prevalence_intimatepartner_WHOStudy.pdf</a> | No |
| <b>WSM 2018</b> | 15-49 | 18   | No  | WHO VAW 2018                                                 | <a href="https://www.who.int/publications/i/item/9789240022256">https://www.who.int/publications/i/item/9789240022256</a>                                                                                                                     | No |
| <b>WSM 2020</b> | 15-49 | 22   | Yes | The Samoa Family Health and Safety Study                     | <a href="https://unstats.un.org/sdgs/indicators/database/">https://unstats.un.org/sdgs/indicators/database/</a>                                                                                                                               | No |
| <b>XKX 2018</b> | 15-49 | 5    | No  | WHO VAW 2018                                                 | <a href="https://www.who.int/publications/i/item/9789240022256">https://www.who.int/publications/i/item/9789240022256</a>                                                                                                                     | No |
| <b>ZAF 2016</b> | 15-49 | 8.5  | No  | DHS                                                          | <a href="https://dhsprogram.com/">https://dhsprogram.com/</a>                                                                                                                                                                                 | No |
| <b>ZAF 2018</b> | 15-49 | 13   | No  | WHO VAW 2018                                                 | <a href="https://www.who.int/publications/i/item/9789240022256">https://www.who.int/publications/i/item/9789240022256</a>                                                                                                                     | No |
| <b>ZMB 2007</b> | 15-49 | 43   | No  | DHS                                                          | <a href="https://dhsprogram.com/">https://dhsprogram.com/</a>                                                                                                                                                                                 | No |
| <b>ZMB 2014</b> | 15-49 | 26.7 | Yes | DHS                                                          | <a href="https://unstats.un.org/sdgs/indicators/database/">https://unstats.un.org/sdgs/indicators/database/</a>                                                                                                                               | No |
| <b>ZMB 2018</b> | 15-49 | 25.3 | No  | DHS                                                          | <a href="https://dhsprogram.com/">https://dhsprogram.com/</a>                                                                                                                                                                                 | No |
| <b>ZWE 2006</b> | 15-49 | 30.5 | No  | DHS                                                          | <a href="https://dhsprogram.com/">https://dhsprogram.com/</a>                                                                                                                                                                                 | No |
| <b>ZWE 2011</b> | 15-49 | 27.2 | No  | DHS                                                          | <a href="https://dhsprogram.com/">https://dhsprogram.com/</a>                                                                                                                                                                                 | No |
| <b>ZWE 2015</b> | 15-49 | 19.9 | Yes | DHS                                                          | <a href="https://unstats.un.org/sdgs/indicators/database/">https://unstats.un.org/sdgs/indicators/database/</a>                                                                                                                               | No |
| <b>ZWE 2018</b> | 15-49 | 18   | No  | WHO VAW 2018                                                 | <a href="https://www.who.int/publications/i/item/9789240022256">https://www.who.int/publications/i/item/9789240022256</a>                                                                                                                     | No |
| <b>ZWE 2019</b> | 15-49 | 18.7 | No  | MICS                                                         | <a href="http://mics.unicef.org/surveys">http://mics.unicef.org/surveys</a>                                                                                                                                                                   | No |

**Appendix C. Table A3: Total sample in the main macro analysis and sensitivity analysis (analytical sample shown with sensitivity analysis sample in brackets)**

| Country                          | LCA analyses N = 5,732 (N = 1,451) |                       | IPV analyses N = 3,175 (N = 134) |                       |
|----------------------------------|------------------------------------|-----------------------|----------------------------------|-----------------------|
|                                  | Number of country-years            | Year range            | Number of country-years          | Year range            |
| Afghanistan                      | 31 (4)                             | 1990-2020 (1995-2015) | 16 (1)                           | 2005-2020 (2015-2015) |
| Angola                           | 31 (9)                             | 1990-2020 (1990-2016) | 15 (1)                           | 2006-2020 (2016-2016) |
| Albania                          | 31 (7)                             | 1990-2020 (1995-2018) | 13 (1)                           | 2008-2020 (2018-2018) |
| United Arab Emirates             | 31 (7)                             | 1990-2020 (1990-2017) | 0 (0)                            | - (-)                 |
| Argentina                        | 31 (11)                            | 1990-2020 (1990-2018) | 16 (2)                           | 2005-2020 (2015-2018) |
| Armenia                          | 31 (8)                             | 1990-2020 (1990-2016) | 15 (1)                           | 2006-2020 (2016-2016) |
| Antigua and Barbuda              | 31 (6)                             | 1990-2020 (1990-2015) | 0 (0)                            | - (-)                 |
| Australia                        | 31 (8)                             | 1990-2020 (1990-2018) | 28 (1)                           | 1993-2020 (2018-2018) |
| Austria                          | 31 (6)                             | 1990-2020 (1990-2015) | 19 (0)                           | 2002-2020 (-)         |
| Azerbaijan                       | 31 (7)                             | 1990-2020 (1990-2015) | 25 (0)                           | 1996-2020 (-)         |
| Burundi                          | 31 (12)                            | 1990-2020 (1990-2017) | 14 (1)                           | 2007-2020 (2017-2017) |
| Belgium                          | 31 (6)                             | 1990-2020 (1990-2015) | 19 (0)                           | 2002-2020 (-)         |
| Benin                            | 31 (11)                            | 1990-2020 (1990-2018) | 13 (1)                           | 2008-2020 (2018-2018) |
| Burkina Faso                     | 31 (13)                            | 1990-2020 (1990-2017) | 20 (1)                           | 2001-2020 (2011-2011) |
| Bangladesh                       | 31 (13)                            | 1990-2020 (1990-2018) | 28 (2)                           | 1993-2020 (2015-2018) |
| Bulgaria                         | 31 (6)                             | 1990-2020 (1990-2015) | 19 (0)                           | 2002-2020 (-)         |
| Bahrain                          | 31 (6)                             | 1990-2020 (1990-2015) | 0 (0)                            | - (-)                 |
| Bahamas, The                     | 31 (6)                             | 1990-2020 (1990-2015) | 0 (0)                            | - (-)                 |
| Bosnia and Herzegovina           | 31 (6)                             | 1990-2020 (1995-2015) | 13 (0)                           | 2008-2020 (-)         |
| Belarus                          | 31 (8)                             | 1990-2020 (1990-2015) | 13 (0)                           | 2008-2020 (-)         |
| Belize                           | 31 (6)                             | 1990-2020 (1990-2015) | 13 (0)                           | 2008-2020 (-)         |
| Bolivia                          | 31 (11)                            | 1990-2020 (1990-2017) | 23 (1)                           | 1998-2020 (2016-2016) |
| Brazil                           | 31 (13)                            | 1990-2020 (1990-2018) | 28 (2)                           | 1993-2020 (2003-2018) |
| Barbados                         | 31 (6)                             | 1990-2020 (1990-2015) | 0 (0)                            | - (-)                 |
| Brunei Darussalam                | 31 (6)                             | 1990-2020 (1990-2015) | 0 (0)                            | - (-)                 |
| Bhutan                           | 31 (6)                             | 1990-2020 (1990-2015) | 14 (0)                           | 2007-2020 (-)         |
| Botswana                         | 31 (9)                             | 1990-2020 (1990-2015) | 13 (0)                           | 2008-2020 (-)         |
| Central African Republic         | 31 (8)                             | 1990-2020 (1990-2016) | 25 (0)                           | 1996-2020 (-)         |
| Canada                           | 31 (7)                             | 1990-2020 (1990-2015) | 31 (0)                           | 1990-2020 (-)         |
| Switzerland                      | 31 (6)                             | 1990-2020 (1990-2015) | 28 (0)                           | 1993-2020 (-)         |
| Chile                            | 31 (11)                            | 1990-2020 (1990-2018) | 13 (1)                           | 2008-2020 (2018-2018) |
| China                            | 31 (8)                             | 1990-2020 (1990-2018) | 18 (2)                           | 2003-2020 (2013-2018) |
| Côte d'Ivoire                    | 31 (9)                             | 1990-2020 (1990-2016) | 19 (0)                           | 2002-2020 (-)         |
| Cameroon                         | 31 (10)                            | 1990-2020 (1990-2015) | 27 (2)                           | 1994-2020 (2011-2014) |
| Democratic Republic of the Congo | 31 (9)                             | 1990-2020 (1990-2015) | 24 (1)                           | 1997-2020 (2014-2014) |
| Congo, Rep.                      | 31 (7)                             | 1990-2020 (1990-2015) | 0 (0)                            | - (-)                 |
| Colombia                         | 31 (10)                            | 1990-2020 (1990-2018) | 26 (3)                           | 1995-2020 (2005-2018) |
| Comoros                          | 31 (6)                             | 1990-2020 (1990-2015) | 19 (0)                           | 2002-2020 (-)         |
| Cape Verde                       | 31 (6)                             | 1990-2020 (1990-2015) | 26 (1)                           | 1995-2020 (2005-2005) |
| Costa Rica                       | 31 (10)                            | 1990-2020 (1990-2018) | 28 (1)                           | 1993-2020 (2018-2018) |
| Cuba                             | 29 (5)                             | 1992-2020 (1995-2015) | 13 (0)                           | 2008-2020 (-)         |
| Cyprus                           | 31 (8)                             | 1990-2020 (1990-2015) | 19 (0)                           | 2002-2020 (-)         |
| Czech Republic                   | 31 (5)                             | 1990-2020 (1995-2015) | 28 (0)                           | 1993-2020 (-)         |
| Germany                          | 31 (7)                             | 1990-2020 (1990-2015) | 19 (0)                           | 2002-2020 (-)         |
| Djibouti                         | 31 (6)                             | 1990-2020 (1990-2015) | 0 (0)                            | - (-)                 |
| Dominica                         | 10 (1)                             | 2011-2020 (2015-2015) | 0 (0)                            | - (-)                 |
| Denmark                          | 31 (6)                             | 1990-2020 (1990-2015) | 28 (0)                           | 1993-2020 (-)         |
| Dominican Republic               | 31 (11)                            | 1990-2020 (1990-2018) | 29 (2)                           | 1992-2020 (2013-2018) |
| Algeria                          | 31 (10)                            | 1990-2020 (1990-2015) | 0 (0)                            | - (-)                 |
| Ecuador                          | 31 (9)                             | 1990-2020 (1990-2018) | 27 (1)                           | 1994-2020 (2018-2018) |
| Egypt                            | 31 (11)                            | 1990-2020 (1990-2018) | 26 (3)                           | 1995-2020 (2005-2018) |
| Eritrea                          | 31 (5)                             | 1990-2020 (1995-2015) | 0 (0)                            | - (-)                 |
| Spain                            | 31 (7)                             | 1990-2020 (1990-2015) | 19 (0)                           | 2002-2020 (-)         |
| Estonia                          | 31 (7)                             | 1990-2020 (1990-2015) | 19 (0)                           | 2002-2020 (-)         |
| Ethiopia                         | 31 (10)                            | 1990-2020 (1990-2016) | 28 (1)                           | 1993-2020 (2016-2016) |
| Finland                          | 31 (6)                             | 1990-2020 (1990-2015) | 19 (0)                           | 2002-2020 (-)         |
| Fiji                             | 31 (6)                             | 1990-2020 (1990-2015) | 20 (0)                           | 2001-2020 (-)         |
| France                           | 31 (6)                             | 1990-2020 (1990-2015) | 31 (1)                           | 1990-2020 (2000-2000) |
| Micronesia (Federated States of) | 31 (6)                             | 1990-2020 (1990-2015) | 17 (0)                           | 2004-2020 (-)         |
| Gabon                            | 31 (9)                             | 1990-2020 (1990-2017) | 19 (1)                           | 2002-2020 (2012-2012) |
| United Kingdom                   | 31 (6)                             | 1990-2020 (1990-2015) | 26 (1)                           | 1995-2020 (2005-2005) |
| Georgia                          | 31 (10)                            | 1990-2020 (1990-2018) | 26 (2)                           | 1995-2020 (2005-2018) |
| Ghana                            | 31 (14)                            | 1990-2020 (1990-2017) | 23 (1)                           | 1998-2020 (2008-2008) |
| Guinea                           | 31 (7)                             | 1990-2020 (1990-2015) | 13 (0)                           | 2008-2020 (-)         |
| Gambia                           | 31 (8)                             | 1990-2020 (1990-2015) | 18 (1)                           | 2003-2020 (2013-2013) |
| Guinea-Bissau                    | 31 (7)                             | 1990-2020 (1990-2015) | 0 (0)                            | - (-)                 |
| Equatorial Guinea                | 31 (6)                             | 1990-2020 (1990-2015) | 20 (0)                           | 2001-2020 (-)         |

|                                  |         |                       |        |                       |
|----------------------------------|---------|-----------------------|--------|-----------------------|
| Greece                           | 31 (7)  | 1990-2020 (1990-2017) | 19 (0) | 2002-2020 (-)         |
| Grenada                          | 31 (6)  | 1990-2020 (1990-2015) | 13 (0) | 2008-2020 (-)         |
| Guatemala                        | 31 (7)  | 1990-2020 (1990-2015) | 22 (2) | 1999-2020 (2009-2015) |
| Guyana                           | 31 (6)  | 1990-2020 (1990-2015) | 13 (0) | 2008-2020 (-)         |
| Hong Kong SAR, China             | 7 (0)   | 2014-2020 (-)         | 7 (0)  | 2014-2020 (-)         |
| Honduras                         | 31 (9)  | 1990-2020 (1990-2018) | 25 (2) | 1996-2020 (2012-2018) |
| Croatia                          | 31 (5)  | 1990-2020 (1995-2015) | 19 (0) | 2002-2020 (-)         |
| Haiti                            | 31 (7)  | 1990-2020 (1990-2016) | 31 (1) | 1990-2020 (2000-2000) |
| Hungary                          | 31 (6)  | 1990-2020 (1990-2015) | 19 (0) | 2002-2020 (-)         |
| Indonesia                        | 31 (12) | 1990-2020 (1990-2018) | 13 (1) | 2008-2020 (2018-2018) |
| India                            | 31 (11) | 1990-2020 (1990-2017) | 25 (2) | 1996-2020 (2006-2016) |
| Ireland                          | 31 (6)  | 1990-2020 (1990-2015) | 19 (0) | 2002-2020 (-)         |
| Iran (Islamic Republic of)       | 31 (6)  | 1990-2020 (1990-2015) | 13 (0) | 2008-2020 (-)         |
| Iraq                             | 31 (8)  | 1990-2020 (1990-2018) | 0 (0)  | - (-)                 |
| Iceland                          | 31 (6)  | 1990-2020 (1990-2015) | 23 (0) | 1998-2020 (-)         |
| Israel                           | 31 (7)  | 1990-2020 (1990-2016) | 13 (0) | 2008-2020 (-)         |
| Italy                            | 31 (6)  | 1990-2020 (1990-2015) | 25 (0) | 1996-2020 (-)         |
| Jamaica                          | 31 (7)  | 1990-2020 (1990-2015) | 22 (1) | 1999-2020 (2009-2009) |
| Jordan                           | 31 (10) | 1990-2020 (1990-2018) | 24 (2) | 1997-2020 (2012-2018) |
| Japan                            | 31 (6)  | 1990-2020 (1990-2015) | 28 (0) | 1993-2020 (-)         |
| Kazakhstan                       | 31 (10) | 1990-2020 (1990-2018) | 20 (3) | 2001-2020 (2011-2018) |
| Kenya                            | 31 (13) | 1990-2020 (1990-2017) | 28 (2) | 1993-2020 (2009-2014) |
| Kyrgyz Republic                  | 31 (9)  | 1990-2020 (1990-2018) | 19 (2) | 2002-2020 (2012-2018) |
| Cambodia                         | 31 (8)  | 1990-2020 (1995-2015) | 31 (4) | 1990-2020 (2000-2014) |
| Kiribati                         | 31 (6)  | 1990-2020 (1990-2015) | 23 (0) | 1998-2020 (-)         |
| South Korea                      | 31 (7)  | 1990-2020 (1990-2018) | 13 (1) | 2008-2020 (2018-2018) |
| Kuwait                           | 31 (5)  | 1990-2020 (1995-2015) | 0 (0)  | - (-)                 |
| Lao People's Democratic Republic | 31 (7)  | 1990-2020 (1990-2017) | 17 (0) | 2004-2020 (-)         |
| Lebanon                          | 31 (8)  | 1990-2020 (1990-2018) | 0 (0)  | - (-)                 |
| Liberia                          | 29 (7)  | 1992-2020 (1995-2015) | 24 (1) | 1997-2020 (2007-2007) |
| Libya                            | 31 (7)  | 1990-2020 (1995-2015) | 0 (0)  | - (-)                 |
| St. Lucia                        | 31 (6)  | 1990-2020 (1990-2015) | 0 (0)  | - (-)                 |
| Sri Lanka                        | 31 (12) | 1990-2020 (1990-2017) | 18 (1) | 2003-2020 (2013-2013) |
| Lesotho                          | 31 (11) | 1990-2020 (1990-2018) | 13 (1) | 2008-2020 (2018-2018) |
| Lithuania                        | 31 (6)  | 1990-2020 (1990-2015) | 19 (0) | 2002-2020 (-)         |
| Luxembourg                       | 31 (6)  | 1990-2020 (1990-2015) | 19 (0) | 2002-2020 (-)         |
| Latvia                           | 31 (5)  | 1990-2020 (1995-2015) | 19 (0) | 2002-2020 (-)         |
| Morocco                          | 31 (11) | 1990-2020 (1990-2015) | 21 (1) | 2000-2020 (2010-2010) |
| Republic of Moldova              | 31 (8)  | 1990-2020 (1990-2015) | 26 (1) | 1995-2020 (2005-2005) |
| Madagascar                       | 31 (7)  | 1990-2020 (1990-2015) | 13 (0) | 2008-2020 (-)         |
| Maldives                         | 31 (6)  | 1990-2020 (1990-2015) | 25 (0) | 1996-2020 (-)         |
| Mexico                           | 31 (8)  | 1990-2020 (1990-2018) | 15 (1) | 2006-2020 (2018-2018) |
| Marshall Islands                 | 13 (0)  | 2008-2020 (-)         | 13 (0) | 2008-2020 (-)         |
| North Macedonia                  | 31 (5)  | 1990-2020 (1995-2015) | 13 (0) | 2008-2020 (-)         |
| Mali                             | 31 (10) | 1990-2020 (1990-2018) | 25 (1) | 1996-2020 (2018-2018) |
| Malta                            | 31 (6)  | 1990-2020 (1990-2015) | 21 (1) | 2000-2020 (2010-2010) |
| Myanmar                          | 31 (12) | 1990-2020 (1990-2017) | 15 (1) | 2006-2020 (2016-2016) |
| Montenegro                       | 21 (4)  | 2000-2020 (2005-2018) | 13 (1) | 2008-2020 (2018-2018) |
| Mongolia                         | 31 (6)  | 1990-2020 (1995-2018) | 14 (1) | 2007-2020 (2018-2018) |
| Mozambique                       | 31 (10) | 1990-2020 (1990-2015) | 27 (2) | 1994-2020 (2011-2015) |
| Mauritania                       | 31 (6)  | 1990-2020 (1990-2015) | 0 (0)  | - (-)                 |
| Mauritius                        | 31 (6)  | 1990-2020 (1990-2015) | 0 (0)  | - (-)                 |
| Malawi                           | 31 (11) | 1990-2020 (1990-2016) | 27 (3) | 1994-2020 (2004-2016) |
| Malaysia                         | 31 (10) | 1990-2020 (1990-2018) | 0 (0)  | - (-)                 |
| Namibia                          | 31 (11) | 1990-2020 (1990-2015) | 28 (2) | 1993-2020 (2003-2013) |
| Niger                            | 31 (10) | 1990-2020 (1990-2015) | 13 (0) | 2008-2020 (-)         |
| Nigeria                          | 31 (10) | 1990-2020 (1990-2018) | 23 (3) | 1998-2020 (2008-2018) |
| Nicaragua                        | 31 (6)  | 1990-2020 (1990-2015) | 24 (0) | 1997-2020 (-)         |
| Netherlands                      | 31 (7)  | 1990-2020 (1990-2015) | 19 (1) | 2002-2020 (2012-2012) |
| Norway                           | 31 (6)  | 1990-2020 (1990-2015) | 23 (0) | 1998-2020 (-)         |
| Nepal                            | 31 (9)  | 1990-2020 (1990-2016) | 20 (2) | 2001-2020 (2011-2016) |
| New Zealand                      | 31 (7)  | 1990-2020 (1990-2015) | 29 (0) | 1992-2020 (-)         |
| Oman                             | 31 (5)  | 1990-2020 (1995-2015) | 0 (0)  | - (-)                 |
| Pakistan                         | 31 (13) | 1990-2020 (1990-2018) | 13 (1) | 2008-2020 (2018-2018) |
| Panama                           | 31 (8)  | 1990-2020 (1990-2015) | 22 (0) | 1999-2020 (-)         |
| Peru                             | 31 (13) | 1990-2020 (1990-2018) | 28 (9) | 1993-2020 (2010-2018) |
| Philippines                      | 31 (9)  | 1990-2020 (1990-2017) | 26 (2) | 1995-2020 (2005-2017) |
| Papua New Guinea                 | 31 (6)  | 1990-2020 (1990-2015) | 18 (0) | 2003-2020 (-)         |
| Poland                           | 31 (7)  | 1990-2020 (1990-2015) | 27 (1) | 1994-2020 (2012-2012) |
| Puerto Rico                      | 31 (6)  | 1990-2020 (1990-2015) | 0 (0)  | - (-)                 |
| Korea, Dem. People's Rep.        | 11 (0)  | 2010-2020 (-)         | 0 (0)  | - (-)                 |
| Portugal                         | 31 (6)  | 1990-2020 (1990-2015) | 19 (0) | 2002-2020 (-)         |
| Paraguay                         | 31 (10) | 1990-2020 (1990-2018) | 23 (2) | 1998-2020 (2008-2018) |
| Occupied Palestinian territory   | 31 (5)  | 1990-2020 (1995-2015) | 13 (0) | 2008-2020 (-)         |
| Qatar                            | 31 (7)  | 1990-2020 (1990-2015) | 0 (0)  | - (-)                 |



|                                       |         |                       |        |                       |
|---------------------------------------|---------|-----------------------|--------|-----------------------|
| <b>Romania</b>                        | 31 (8)  | 1990-2020 (1990-2018) | 19 (2) | 2002-2020 (2012-2018) |
| <b>Russia</b>                         | 31 (8)  | 1990-2020 (1990-2017) | 0 (0)  | - (-)                 |
| <b>Rwanda</b>                         | 31 (12) | 1990-2020 (1990-2016) | 26 (3) | 1995-2020 (2005-2015) |
| <b>Saudi Arabia</b>                   | 31 (5)  | 1990-2020 (1995-2015) | 0 (0)  | - (-)                 |
| <b>Sudan</b>                          | 31 (10) | 1990-2020 (1990-2015) | 13 (0) | 2008-2020 (-)         |
| <b>Senegal</b>                        | 31 (12) | 1990-2020 (1990-2017) | 14 (1) | 2007-2020 (2017-2017) |
| <b>Singapore</b>                      | 31 (7)  | 1990-2020 (1990-2015) | 22 (0) | 1999-2020 (-)         |
| <b>Solomon Islands</b>                | 31 (6)  | 1990-2020 (1990-2015) | 23 (0) | 1998-2020 (-)         |
| <b>Sierra Leone</b>                   | 31 (10) | 1990-2020 (1990-2017) | 18 (1) | 2003-2020 (2013-2013) |
| <b>El Salvador</b>                    | 31 (12) | 1990-2020 (1990-2018) | 23 (3) | 1998-2020 (2008-2018) |
| <b>Somalia</b>                        | 31 (6)  | 1990-2020 (1990-2015) | 0 (0)  | - (-)                 |
| <b>Serbia</b>                         | 31 (6)  | 1990-2020 (1995-2017) | 28 (0) | 1993-2020 (-)         |
| <b>South Sudan</b>                    | 13 (2)  | 2008-2020 (2010-2015) | 13 (0) | 2008-2020 (-)         |
| <b>São Tomé and Príncipe</b>          | 31 (6)  | 1990-2020 (1990-2015) | 22 (0) | 1999-2020 (-)         |
| <b>Suriname</b>                       | 31 (6)  | 1990-2020 (1990-2015) | 13 (0) | 2008-2020 (-)         |
| <b>Slovak Republic</b>                | 31 (6)  | 1990-2020 (1990-2015) | 23 (0) | 1998-2020 (-)         |
| <b>Slovenia</b>                       | 31 (7)  | 1990-2020 (1990-2015) | 19 (0) | 2002-2020 (-)         |
| <b>Sweden</b>                         | 31 (7)  | 1990-2020 (1990-2015) | 19 (0) | 2002-2020 (-)         |
| <b>Eswatini</b>                       | 31 (10) | 1990-2020 (1990-2016) | 13 (0) | 2008-2020 (-)         |
| <b>Seychelles</b>                     | 31 (6)  | 1990-2020 (1990-2015) | 0 (0)  | - (-)                 |
| <b>Syrian Arab Republic</b>           | 31 (6)  | 1990-2020 (1990-2015) | 0 (0)  | - (-)                 |
| <b>Chad</b>                           | 31 (6)  | 1990-2020 (1990-2015) | 16 (1) | 2005-2020 (2015-2015) |
| <b>Togo</b>                           | 31 (8)  | 1990-2020 (1990-2017) | 17 (0) | 2004-2020 (-)         |
| <b>Thailand</b>                       | 31 (14) | 1990-2020 (1990-2018) | 28 (1) | 1993-2020 (2018-2018) |
| <b>Tajikistan</b>                     | 31 (6)  | 1990-2020 (1990-2015) | 19 (0) | 2002-2020 (-)         |
| <b>Turkmenistan</b>                   | 31 (5)  | 1990-2020 (1995-2015) | 0 (0)  | - (-)                 |
| <b>Timor-Leste</b>                    | 31 (5)  | 1990-2020 (1995-2015) | 21 (1) | 2000-2020 (2010-2010) |
| <b>Tonga</b>                          | 31 (7)  | 1990-2020 (1990-2015) | 22 (0) | 1999-2020 (-)         |
| <b>Trinidad and Tobago</b>            | 31 (6)  | 1990-2020 (1990-2015) | 14 (0) | 2007-2020 (-)         |
| <b>Tunisia</b>                        | 31 (9)  | 1990-2020 (1990-2018) | 13 (1) | 2008-2020 (2018-2018) |
| <b>Turkey</b>                         | 31 (9)  | 1990-2020 (1990-2018) | 23 (1) | 1998-2020 (2018-2018) |
| <b>Taiwan, China</b>                  | 16 (0)  | 2005-2020 (-)         | 0 (0)  | - (-)                 |
| <b>United Republic of Tanzania</b>    | 31 (13) | 1990-2020 (1990-2017) | 28 (3) | 1993-2020 (2003-2016) |
| <b>Uganda</b>                         | 31 (13) | 1990-2020 (1990-2017) | 25 (3) | 1996-2020 (2006-2016) |
| <b>Ukraine</b>                        | 31 (9)  | 1990-2020 (1990-2015) | 24 (0) | 1997-2020 (-)         |
| <b>Uruguay</b>                        | 31 (10) | 1990-2020 (1990-2018) | 18 (2) | 2003-2020 (2013-2018) |
| <b>United States of America</b>       | 31 (9)  | 1990-2020 (1990-2017) | 31 (1) | 1990-2020 (2000-2000) |
| <b>Uzbekistan</b>                     | 31 (6)  | 1990-2020 (1990-2015) | 0 (0)  | - (-)                 |
| <b>St. Vincent and the Grenadines</b> | 31 (6)  | 1990-2020 (1990-2015) | 0 (0)  | - (-)                 |
| <b>Venezuela</b>                      | 31 (6)  | 1990-2020 (1990-2015) | 13 (0) | 2008-2020 (-)         |
| <b>Virgin Islands (U.S.)</b>          | 3 (0)   | 2018-2020 (-)         | 0 (0)  | - (-)                 |
| <b>Vietnam</b>                        | 31 (11) | 1990-2020 (1990-2016) | 21 (1) | 2000-2020 (2010-2010) |
| <b>Vanuatu</b>                        | 31 (6)  | 1990-2020 (1990-2015) | 22 (0) | 1999-2020 (-)         |
| <b>Samoa</b>                          | 31 (6)  | 1990-2020 (1990-2015) | 28 (0) | 1993-2020 (-)         |
| <b>Yemen, Rep.</b>                    | 31 (6)  | 1990-2020 (1990-2015) | 0 (0)  | - (-)                 |
| <b>South Africa</b>                   | 31 (14) | 1990-2020 (1990-2017) | 15 (1) | 2006-2020 (2016-2016) |
| <b>Zambia</b>                         | 31 (11) | 1990-2020 (1990-2018) | 24 (3) | 1997-2020 (2007-2018) |
| <b>Zimbabwe</b>                       | 31 (11) | 1990-2020 (1990-2017) | 25 (3) | 1996-2020 (2006-2015) |

## Appendix D. Example Stata gsem syntax

```

gsem (conf25 i_natdis_sev5 colever i_unwntnei_high2 <-, logit) ///
(i_lngdp i_gini i_lnhomi <- ) ///
(i_gii <-, family(beta) link(logit)) ///
(C <- c.yr), ///
lclass (C 3) startvalues(randompr, draws(200) seed (10)) ///
vce(cluster geocode) ///
covstructure(e._OEn, unstructured) ///
lcinvariant(none) ///
nodvheader

```

NB: i\_ prefix indicates variable is partially imputed (i.e. we forward filled gaps in estimates with existing data).

## Appendix E. Table A4: LCA Goodness of Fit and Class Separation Statistics

| k | LL     | df | LMR LT (k vs k-1) |              |              |             | Class 1    |        |       | Class 2     |       |       | Class 3 |             |       | Class 4 |       |             | Class 5 |       |     |       |       |       |     |      |      |       |
|---|--------|----|-------------------|--------------|--------------|-------------|------------|--------|-------|-------------|-------|-------|---------|-------------|-------|---------|-------|-------------|---------|-------|-----|-------|-------|-------|-----|------|------|-------|
|   |        |    | AIC               | BIC          | SSBIC        | E           | Test stat. | P      | n     | AvePP       | Prop. | OCC   | n       | AvePP       | Prop. | OCC     | n     | AvePP       | Prop.   | OCC   | n   | AvePP | Prop. | OCC   |     |      |      |       |
| 1 | -43105 | 15 | 86240             | 86340        | 86303        | .           | .          | .      | 1.00  | 1.00        | .     |       |         |             |       |         |       |             |         |       |     |       |       |       |     |      |      |       |
| 2 | -40157 | 32 | 80378             | 80591        | 80501        | <b>0.88</b> | 5677       | <0.001 | 4,327 | <b>0.98</b> | 0.75  | 13.10 | 1,405   | <b>0.94</b> | 0.25  | 43.81   |       |             |         |       |     |       |       |       |     |      |      |       |
| 3 | -39070 | 49 | 78238             | 78564        | 78419        | 0.77        | 2094       | <0.001 | 1,386 | 0.93        | 0.24  | 43.58 | 2,262   | 0.90        | 0.40  | 13.89   | 2,084 | 0.86        | 0.36    | 10.78 |     |       |       |       |     |      |      |       |
| 4 | -38593 | 64 | 77314             | 77740        | 77558        | 0.78        | 919        | <0.001 | 2,214 | 0.90        | 0.38  | 14.60 | 1,361   | 0.87        | 0.23  | 22.94   | 1,177 | <b>0.91</b> | 0.20    | 39.00 | 980 | 0.81  | 0.18  | 18.71 |     |      |      |       |
| 5 | -38286 | 81 | <b>76735</b>      | <b>77274</b> | <b>77038</b> | 0.79        | 591        | <0.001 | 1,365 | 0.87        | 0.24  | 22.08 | 753     | 0.84        | 0.13  | 35.41   | 2,253 | 0.90        | 0.39    | 13.95 | 882 | 0.81  | 0.16  | 21.56 | 479 | 0.88 | 0.08 | 80.99 |

$N = 5,732$  country-years.  $K$ : number of classes in latent class model. Lower AIC (Akaike Information Criterion) and BIC (Bayesian Information Criterion) values indicate better model fit (SSBIC: Sample size adjusted BIC); the lowest values are highlighted in bold. Entropy values approaching 1 indicate clear delineation of classes, whilst entropy values less than 0.8 are problematic if most likely class membership is used as a variable in further analysis; entropy values less than 0.8 are highlighted in yellow, and highest entropy value highlighted in bold. LMR LT: Lo-Mendell-Rubin Likelihood Ratio Test of  $k - 1$  classes against  $k$  classes, where a significant result thereby indicates that the null hypothesis of  $k - 1$  classes should be rejected in favour of at least  $k$  classes. AvePP (Average Posterior Probability) should be at least 0.7 for all classes and is so in all models, and highest AvePPs are highlighted in bold. Larger values of Odds of Correct Classification (OCC) indicate better assignment accuracy and an OCC greater than 5 for all classes is indicative that the model has high assignment accuracy (the case here for all models), highest OCCs shown in bold. Models adjusted for the effect of time and clustering at the country level. Models with 1-5 classes all converged successfully. However, the 4 and 5 class models needed some parameters constrained as probabilities were very close to 0 or 1 (conflict was constrained to 15 in Class 2 in the 5 class model and Class 1 in the 4 class model and social discrimination to -15 in Class 3 in the 5 class model and Class 2 in the 4 class model) (Ng, 2018b; Ng & Schechter, 2017).

## Appendix F. Data acknowledgements

Many thanks to the various statistical agencies from around the world involved in producing the original data, including those listed in the table below:

|                    |                                                        |
|--------------------|--------------------------------------------------------|
| Argentina          | National Institute of Statistics and Censuses          |
| Armenia            | National Statistical Service                           |
| Austria            | National Bureau of Statistics                          |
| Bangladesh         | Bureau of Statistics                                   |
| Belarus            | Ministry of Statistics and Analysis                    |
| Benin              | National Institute of Statistics and Economic Analysis |
| Bolivia            | National Institute of Statistics                       |
| Botswana           | Central Statistics Office                              |
| Brazil             | Institute of Geography and Statistics                  |
| Burkina Faso       | National Institute of Statistics and Demography        |
| Cambodia           | National Institute of Statistics                       |
| Cameroon           | Central Bureau of Census and Population Studies        |
| Canada             | Statistics Canada                                      |
| Chile              | National Institute of Statistics                       |
| China              | National Bureau of Statistics                          |
| Colombia           | National Administrative Department of Statistics       |
| Costa Rica         | National Institute of Statistics and Censuses          |
| Cuba               | Office of National Statistics                          |
| Dominican Republic | National Statistics Office                             |
| Ecuador            | National Institute of Statistics and Censuses          |
| Egypt              | Central Agency for Public Mobilization and Statistics  |
| El Salvador        | General Directorate of Statistics and Censuses         |
| Ethiopia           | Central Statistical Agency                             |
| Fiji Islands       | Bureau of Statistics                                   |
| France             | National Institute of Statistics and Economic Studies  |
| Germany            | Federal Statistical Office                             |
| Ghana              | Ghana Statistical Services                             |
| Greece             | National Statistical Office                            |
| Guatemala          | National Institute of Statistics                       |
| Guinea             | National Statistics Directorate                        |
| Haiti              | Institute of Statistics and Informatics                |
| Honduras           | National Institute of Statistics                       |
| Hungary            | Central Statistical Office                             |
| India              | Ministry of Statistics and Programme Implementation    |
| Indonesia          | Statistics Indonesia                                   |
| Iraq               | Central Statistical Office                             |
| Ireland            | Central Statistics Office                              |
| Israel             | Central Bureau of Statistics                           |
| Italy              | National Institute of Statistics                       |
| Jamaica            | Statistical Institute                                  |
| Jordan             | Department of Statistics                               |
| Kenya              | National Bureau of Statistics                          |
| Kyrgyz Republic    | National Statistical Committee                         |
| Laos               | Statistics Bureau                                      |
| Lesotho            | Bureau of Statistics                                   |
| Liberia            | Institute of Statistics and Geo-Information Systems    |
| Malawi             | National Statistical Office                            |
| Malaysia           | Department of Statistics                               |

|                  |                                                              |
|------------------|--------------------------------------------------------------|
| Mali             | National Directorate of Statistics and Informatics           |
| Mexico           | National Institute of Statistics, Geography, and Informatics |
| Mongolia         | National Statistical Office                                  |
| Morocco          | High Commission of Planning                                  |
| Mozambique       | National Institute of Statistics                             |
| Nepal            | Central Bureau of Statistics                                 |
| Netherlands      | Statistics Netherlands                                       |
| Nicaragua        | National Institute of Statistics and Censuses                |
| Nigeria          | National Bureau of Statistics                                |
| Pakistan         | Statistics Division                                          |
| Palestine        | Central Bureau of Statistics                                 |
| Panama           | Census and Statistics Directorate                            |
| Papua New Guinea | National Statistical Office                                  |
| Paraguay         | General Directorate of Statistics, Surveys, and Censuses     |
| Peru             | National Institute of Statistics and Informatics             |
| Philippines      | National Statistics Office                                   |
| Poland           | Central Statistical Office                                   |
| Portugal         | National Institute of Statistics                             |
| Puerto Rico      | U.S. Bureau of the Census                                    |
